# Supplementary material for: Unveiling the catalytic nature of palladium-N-heterocyclic carbene catalysts in the α-alkylation of ketones with primary alcohols
Source: Royal Society of Chemistry journal article supplement (doi:10.1039/d1dt01704g), 2021-01-01
Supplement: d1dt01704g1.pdf [file d1dt01704g1.pdf]

## Supporting Information

### Unveiling the Catalytic Nature of Palladium-N-Heterocyclic Carbene Catalysts in the $\alpha$ -Alkylation of Ketones with Primary Alcohols

Mamajan Ovezova,<sup>a</sup> Zafer Eroğlu<sup>b,c</sup>, Önder Metin,<sup>\*,b</sup> Bekir Çetinkaya,<sup>a</sup> Süleyman Gülcemal<sup>\*,a</sup>

<sup>a</sup> Department of Chemistry, Ege University, 35100 Izmir, Turkey

<sup>b</sup> Department of Chemistry, College of Sciences, KoçUniversity, 34450 Istanbul, Turkey

<sup>c</sup> Nanoscience and Nanoengineering Division, Graduate School of Natural and Applied Sciences, Atatürk University, 25240 Erzurum, Turkey.

\*E-mail: (S.G.): [suleyman.gulcemal@ege.edu.tr](mailto:suleyman.gulcemal@ege.edu.tr) (Ö.M.): [ometin@ku.edu.tr](mailto:ometin@ku.edu.tr)

### Contents

|                                                                                              |     |
|----------------------------------------------------------------------------------------------|-----|
| STEM-HAADF and associated EDX elemental mapping images.....                                  | S2  |
| GC traces to confirm H <sub>2</sub> evolution.....                                           | S3  |
| Analytical data for compounds <b>5a-u</b> .....                                              | S4  |
| References.....                                                                              | S6  |
| Traces of <sup>1</sup> H and <sup>13</sup> C NMR spectra and HRMS analysis of complexes..... | S8  |
| Traces of <sup>1</sup> H and <sup>13</sup> C NMR spectra of products .....                   | S14 |

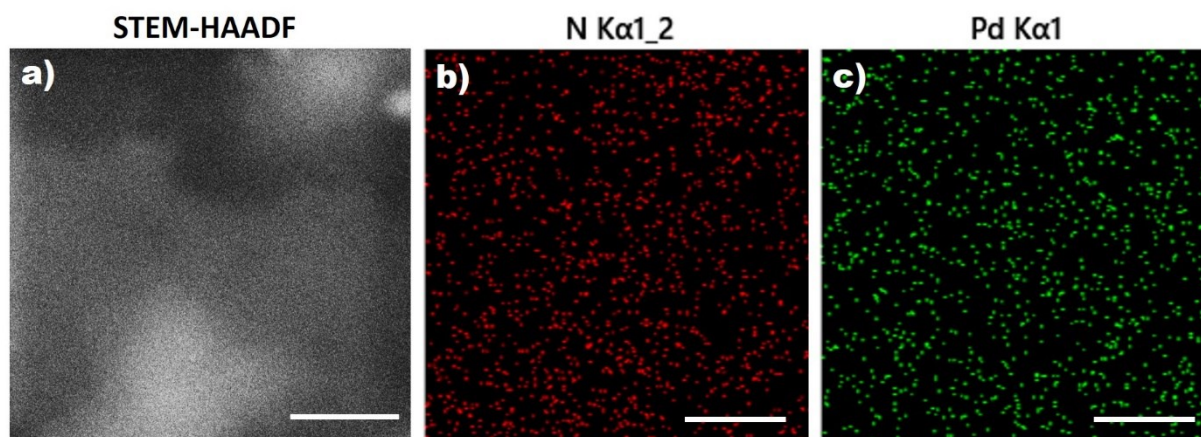

**Figure S1.** a) STEM-HAADF image, and associated EDX elemental mapping images for b) nitrogen and c) palladium atoms

```

=====
Acq. Operator   : gozde
Acq. Instrument : Instrument 1                Location : Vial 1
Injection Date  : 7/1/2021 8:05:32 PM
                                           Inj Volume : Manually

Acq. Method     : C:\CHEM32\1\METHODS\01072021-.M
Last changed    : 7/1/2021 7:47:24 PM by gozde
Analysis Method : C:\CHEM32\1\METHODS\01072021-.M
Last changed    : 7/1/2021 7:31:00 PM by gozde

```

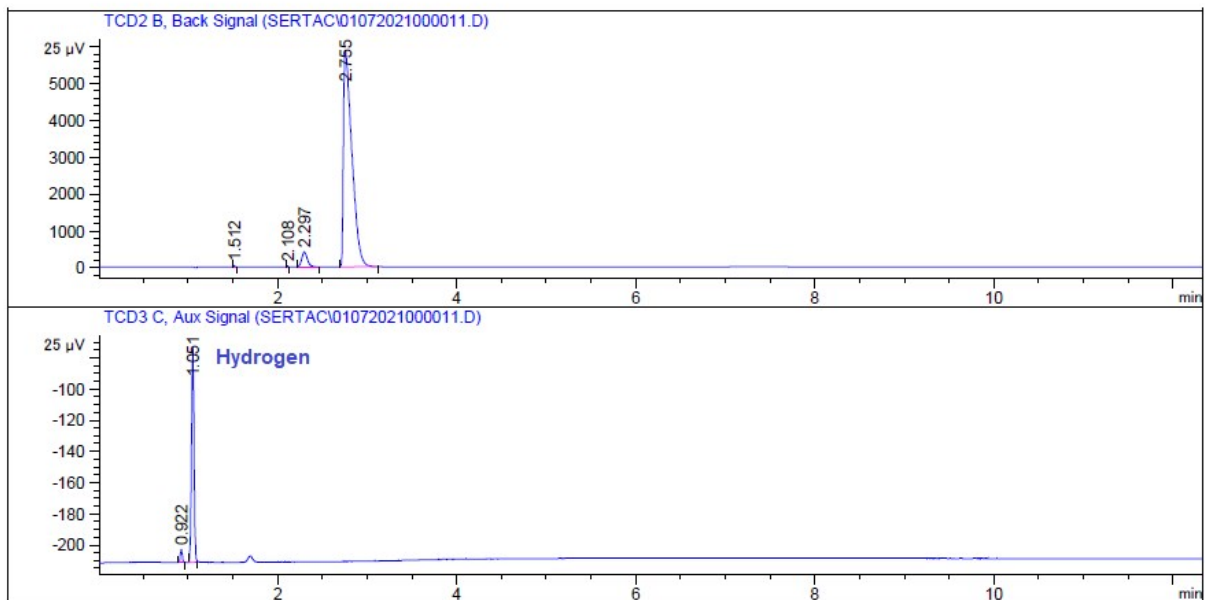

Signal 2: TCD2 B, Back Signal

| RetTime [min] | Type | Area [25 µV*s] | Amt/Area   | Amount [% mole] | Grp | Name |
|---------------|------|----------------|------------|-----------------|-----|------|
| 1.798         | -    | -              | -          | -               |     | CO2  |
| 2.755         | BB S | 3.83853e4      | 2.29724e-3 | 88.18000        |     | N2   |
| 4.217         | -    | -              | -          | -               |     | CO   |
| Totals :      |      |                |            | 88.18000        |     |      |

Signal 3: TCD3 C, Aux Signal

| RetTime [min] | Type | Area [25 µV*s] | Amt/Area   | Amount [% mole] | Grp | Name |
|---------------|------|----------------|------------|-----------------|-----|------|
| 1.051         | BB   | 275.76578      | 5.28236e-3 | 1.45669         |     | H2   |
| Totals :      |      |                |            | 1.45669         |     |      |

Figure S2. GC traces to confirm H<sub>2</sub> evolution.

### Analytical data for compounds 5a-u.

**5a.**<sup>1,2</sup> Yield 172 mg (82%). White solid. <sup>1</sup>H NMR (400 MHz, CDCl<sub>3</sub>, 25 °C, ppm): δ = 7.98 (d, *J* = 7.6 Hz, 2H), 7.58 (t, *J* = 7.4 Hz, 1H), 7.47 (t, *J* = 7.6 Hz, 2H), 7.35-7.21 (m, 5H), 3.32 (t, *J* = 7.6 Hz, 2H), 3.10 (t, *J* = 7.6 Hz, 2H). <sup>13</sup>C{<sup>1</sup>H} NMR (100.6 MHz, CDCl<sub>3</sub>, 25 °C, ppm): δ = 199.0, 141.2, 136.8, 132.9, 128.5, 128.4, 128.3, 127.9, 126.0, 40.3, 30.0.

**5b.**<sup>1-4</sup> Yield 214 mg (89%). White solid. <sup>1</sup>H NMR (400 MHz, CDCl<sub>3</sub>, 25 °C, ppm): δ = 7.97 (d, *J* = 8.4 Hz, 2H), 7.55 (t, 7.4 Hz, 1H), 7.45 (t, *J* = 7.6 Hz, 2H), 7.18 (d, *J* = 8.4, 2H), 6.85 (d, *J* = 7.6 Hz, 2H), 3.79 (s, 3H), 3.27 (t, *J* = 7.6 Hz, 2H), 3.03 (t, *J* = 7.6, 2H). <sup>13</sup>C{<sup>1</sup>H} NMR (100.6 MHz, CDCl<sub>3</sub>, 25 °C, ppm): δ = 199.3, 157.9, 136.8, 133.2, 132.9, 129.3, 128.5, 127.9, 113.9, 55.2, 40.6, 29.2.

**5c.**<sup>2,3</sup> Yield 179 mg (80%). White solid. <sup>1</sup>H NMR (400 MHz, CDCl<sub>3</sub>, 25 °C, ppm): δ = 8.03 (d, *J* = 7.6 Hz, 2H), 7.60 (t, *J* = 7.2 Hz, 1H), 7.50 (t, *J* = 7.6 Hz, 2H), 7.25-7.18 (m, 4H), 3.33 (t, *J* = 7.6 Hz, 2H), 3.11 (t, *J* = 7.6 Hz, 2H), 2.40 (s, 3H). <sup>13</sup>C{<sup>1</sup>H} NMR (100.6 MHz, CDCl<sub>3</sub>, 25 °C, ppm): δ = 198.8, 137.9, 136.6, 135.2, 132.7, 128.9, 128.3, 128.1, 127.8, 40.2, 29.4, 20.8.

**5d.**<sup>1</sup> Yield 212 mg (84%). Colorless oil. <sup>1</sup>H NMR (400 MHz, CDCl<sub>3</sub>, 25 °C, ppm): δ = 8.04 (d, *J* = 7.2 Hz, 2H), 7.60 (t, *J* = 7.8 Hz, 1H), 7.50 (t, *J* = 7.6 Hz, 2H), 7.29-7.25 (m, 4H), 3.36 (t, *J* = 7.6 Hz, 2H), 3.13 (t, *J* = 7.6 Hz, 2H), 3.01-2.94 (m, 1H), 1.34 (d, *J* = 7.2 Hz, 6H). <sup>13</sup>C{<sup>1</sup>H} NMR (100.6 MHz, CDCl<sub>3</sub>, 25 °C, ppm): δ = 198.9, 146.4, 138.4, 136.6, 132.8, 128.3, 128.2, 127.8, 126.3, 40.3, 33.5, 29.5, 23.9.

**5e.**<sup>3</sup> Yield 264 mg (95%). White solid. <sup>1</sup>H NMR (400 MHz, CDCl<sub>3</sub>, 25 °C, ppm): δ = 7.96 (d, *J* = 8.0 Hz, 2H), 7.57-7.54 (m, 3H), 7.46 (t, *J* = 7.6 Hz, 2H), 7.37 (d, *J* = 8.0 Hz, 2H), 3.33 (t, *J* = 7.4 Hz, 2H), 3.14 (t, *J* = 7.4 Hz, 2H); <sup>13</sup>C NMR (CDCl<sub>3</sub>, 100 MHz) δ (ppm): 198.5, 145.4, 136.7, 133.2, 128.8, 128.6, 128.0, 125.4, 39.8, 29.8.

**5h.**<sup>3,5,6</sup> Yield 293 mg (92%). Yellow solid. <sup>1</sup>H NMR (400 MHz, CDCl<sub>3</sub>, 25 °C, ppm): δ = 7.97 (d, *J* = 8.0 Hz, 2H), 7.56 (t, *J* = 7.4 Hz, 1H), 7.46 (t, *J* = 7.4 Hz, 2H), 4.14-4.05 (m, 9H), 3.20 (t, *J* = 7.6 Hz, 2H), 2.80 (t, *J* = 7.8 Hz, 2H). <sup>13</sup>C{<sup>1</sup>H} NMR (100.6 MHz, CDCl<sub>3</sub>, 25 °C, ppm): δ = 199.4, 136.9, 132.9, 128.5, 128.0, 88.0, 68.5, 68.1, 67.3, 40.3, 24.1.

**5i.**<sup>2</sup> Yield 151 mg (63%). White solid. <sup>1</sup>H NMR (400 MHz, CDCl<sub>3</sub>, 25 °C, ppm): δ = 7.98 (d, *J* = 7.6 Hz, 2H), 7.54 (t, *J* = 7.4 Hz, 1H), 7.44 (t, *J* = 7.6 Hz, 2H), 7.21-7.19 (m, 2H), 6.92-6.85 (m, 2H), 3.82 (s, 3H), 3.27 (t, *J* = 7.8 Hz, 2H), 3.06 (t, *J* = 7.8 Hz, 2H). <sup>13</sup>C{<sup>1</sup>H} NMR (100.6 MHz, CDCl<sub>3</sub>, 25 °C, ppm): δ = 199.9, 157.4, 136.8, 132.8, 130.1, 129.4, 128.4, 128.0, 127.4, 120.4, 110.1, 55.1, 38.8, 25.6.

**5j.**<sup>1,3,4</sup> Yield 156 mg (60%). Colorless oil. <sup>1</sup>H NMR (400 MHz, CDCl<sub>3</sub>, 25 °C, ppm): δ = 8.09 (d, *J* = 8.4 Hz, 1H), 7.97 (d, *J* = 8.0 Hz, 2H), 7.90 (d, *J* = 8.0 Hz, 1H), 7.78-7.76 (m, 1H), 7.57-7.50 (m, 3H), 7.46-7.42 (m, 4H), 3.57 (t, *J* = 7.8 Hz, 2H), 3.42 (t, *J* = 7.6 Hz, 2H). <sup>13</sup>C{<sup>1</sup>H} NMR (100.6 MHz, CDCl<sub>3</sub>, 25 °C, ppm): δ = 199.1, 137.2, 136.8, 133.8, 133.0, 131.5, 128.8, 128.5, 127.9, 126.9, 126.0, 126.0, 125.5, 125.5, 123.4, 39.6, 27.0.

**5k.**<sup>1,2</sup> Yield 139 mg (60%). Colorless oil. <sup>1</sup>H NMR (400 MHz, CDCl<sub>3</sub>, 25 °C, ppm): δ = 7.95 (d, *J* = 8.0 Hz, 2H), 7.53 (t, *J* = 7.2 Hz, 1H), 7.44 (t, *J* = 7.6 Hz, 2H), 2.95 (t, *J* = 7.4 Hz, 2H), 1.76-1.69 (m, 2H), 1.38-1.26 (m, 12H), 0.87 (t, *J* = 6.6 Hz, 3H). <sup>13</sup>C{<sup>1</sup>H} NMR (100.6 MHz, CDCl<sub>3</sub>, 25 °C, ppm): δ = 200.5, 137.0, 132.8, 128.5, 128.0, 38.6, 31.8, 29.4, 29.4, 29.3, 29.2, 24.3, 22.6, 14.1.

**5l.**<sup>1,4</sup> Yield 228 mg (95%). White solid. <sup>1</sup>H NMR (400 MHz, CDCl<sub>3</sub>, 25 °C, ppm): δ = 7.95 (d, *J* = 8.8 Hz, 2H), 7.32-7.19 (m, 5H), 6.93 (d, *J* = 9.2 Hz, 2H), 3.86 (s, 3H), 3.26 (t, *J* = 7.6 Hz, 2H), 3.06 (t, *J* = 7.8 Hz, 2H). <sup>13</sup>C{<sup>1</sup>H} NMR (100.6 MHz, CDCl<sub>3</sub>, 25 °C, ppm): δ = 197.8, 163.4, 141.5, 130.3, 130.0, 128.5, 128.4, 126.1, 113.7, 55.4, 40.1, 30.3.

**5m.**<sup>1,3</sup> Yield 193 mg (86%). White solid. <sup>1</sup>H NMR (400 MHz, CDCl<sub>3</sub>, 25 °C, ppm): δ = 7.89 (d, *J* = 8.0 Hz, 2H), 7.34-7.23 (m, 7H), 3.29 (t, *J* = 7.8 Hz, 2H), 3.09 (t, *J* = 7.8 Hz, 2H), 2.42 (s, 3H). <sup>13</sup>C{<sup>1</sup>H} NMR (100.6 MHz, CDCl<sub>3</sub>, 25 °C, ppm): δ = 198.7, 143.7, 143.1, 134.3, 129.2, 128.4, 128.3, 128.1, 126.0, 40.2, 30.1, 21.5.

**5n.**<sup>1,3,4</sup> Yield 253 mg (91%). White solid. <sup>1</sup>H NMR (400 MHz, CDCl<sub>3</sub>, 25 °C, ppm): δ = 8.05 (d, *J* = 8.0 Hz, 2H), 7.72 (d, *J* = 8.4 Hz, 2H), 7.34-7.21 (m, 5H), 3.33 (t, *J* = 7.4 Hz, 2H), 3.10 (t, *J* = 7.6 Hz, 2H). <sup>13</sup>C{<sup>1</sup>H} NMR (100.6 MHz, CDCl<sub>3</sub>, 25 °C, ppm): δ = 198.2, 140.8, 139.5, 134.5, 134.2, 128.6, 128.4, 128.3, 126.3, 125.7, 40.7, 29.9.

**5p.**<sup>1,3</sup> Yield 179 mg (69%). White solid. <sup>1</sup>H NMR (400 MHz, CDCl<sub>3</sub>, 25 °C, ppm): δ = 8.47 (s, 1H), 8.06 (dd, *J*<sub>1</sub> = 10.4 Hz, *J*<sub>2</sub> = 1.6 Hz, 1H), 7.95 (d, *J* = 8.0 Hz, 1H), 7.89 (t, *J* = 7.6 Hz, 2H), 7.63-7.54 (m, 2H), 7.37-7.31 (m, 4H), 7.27-7.22 (m, 1H), 3.45 (t, *J* = 7.8 Hz, 2H), 3.16 (t, *J* = 7.8 Hz, 2H). <sup>13</sup>C{<sup>1</sup>H} NMR (100.6 MHz, CDCl<sub>3</sub>, 25 °C, ppm): δ = 199.1, 141.3, 135.5, 134.1, 132.4, 129.6, 129.5, 129.0, 128.5, 128.4, 128.4, 127.7, 126.7, 126.1, 123.8, 40.5, 30.2.

**5q.**<sup>5,6</sup> Yield 270 mg (85%). Yellow solid. <sup>1</sup>H NMR (400 MHz, CDCl<sub>3</sub>, 25 °C, ppm): δ = 7.32-7.22 (m, 5H), 4.77 (s, 2H), 4.48 (s, 2H), 4.08 (s, 5H), 3.05-3.03 (m, 4H). <sup>13</sup>C{<sup>1</sup>H} NMR (100.6 MHz, CDCl<sub>3</sub>, 25 °C, ppm): δ = 203.0, 141.6, 128.6, 128.4, 126.1, 79.0, 72.2, 69.6, 69.2, 41.4, 30.1.

**5r.**<sup>1,2,4</sup> Yield 130 mg (55%). Yellow oil. <sup>1</sup>H NMR (400 MHz, CDCl<sub>3</sub>, 25 °C, ppm): δ = 8.08 (d, *J* = 7.6 Hz, 1H), 7.46 (t, *J* = 7.4 Hz, 1H), 7.33-7.21 (m, 7H), 3.51 (dd *J*<sub>1</sub> = 17.6 Hz, *J*<sub>2</sub> = 4 Hz, 1H), 2.99-2.86 (m, 2H), 2.79-2.62 (m, 2H), 2.14-2.08 (m, 1H), 1.84-1.74 (m, 1H). <sup>13</sup>C{<sup>1</sup>H} NMR (100.6 MHz, CDCl<sub>3</sub>, 25 °C, ppm): δ = 199.3, 144.0, 140.0, 133.2, 132.4, 129.2, 128.7, 128.3, 127.5, 126.5, 126.1, 49.4, 35.6, 28.6, 27.6.

**5s.**<sup>7</sup> Yield 104 mg (69%). White solid. <sup>1</sup>H NMR (400 MHz, CDCl<sub>3</sub>, 25 °C, ppm): δ = 8.06 (d, *J* = 8.4 Hz, 2H), 7.70 (d, *J* = 8.0 Hz, 2H), 7.65 (d, *J* = 7.2 Hz, 2H), 7.50 (t, *J* = 7.4 Hz, 2H), 7.43 (t, *J* = 7.4 Hz, 1H), 7.18 (q, *J* = 8.4 Hz, 4H), 3.34 (t, *J* = 7.8 Hz, 2H), 3.09 (t, *J* = 7.6 Hz, 2H), 2.37 (s, 3H). <sup>13</sup>C{<sup>1</sup>H} NMR (100.6 MHz, CDCl<sub>3</sub>, 25 °C, ppm): δ = 198.8, 145.6, 139.8, 138.1, 135.6, 135.5, 129.2, 128.9, 128.6, 128.2, 128.1, 127.2, 127.1, 40.6, 29.7, 21.0.

**5t.**<sup>8</sup> Yield 102 mg (68%). White solid. <sup>1</sup>H NMR (400 MHz, CDCl<sub>3</sub>, 25 °C, ppm): δ = 7.91 (d, *J* = 8.0 Hz, 2H), 7.58 (dd, *J*<sub>1</sub> = 18.4 Hz, *J*<sub>2</sub> = 7.2 Hz, 4H), 7.45 (t, *J* = 7.4 Hz, 2H), 7.37-7.33 (m, 3H), 7.27 (d, *J* = 8.4 Hz, 2H), 3.34 (t, *J* = 7.8 Hz, 2H), 3.13 (t, *J* = 7.8 Hz, 2H), 2.43 (s, 3H). <sup>13</sup>C{<sup>1</sup>H} NMR (100.6 MHz, CDCl<sub>3</sub>, 25 °C, ppm): δ = 198.7, 143.8, 140.9, 140.4, 139.0, 134.3, 129.2, 128.8, 128.7, 128.1, 127.2, 127.0, 126.9, 40.2, 29.7, 21.6.

**5u.**<sup>9</sup> Yield 133 mg (79%). White solid. <sup>1</sup>H NMR (400 MHz, CDCl<sub>3</sub>, 25 °C, ppm): δ = 8.06 (d, *J* = 8.0 Hz, 2H), 7.69 (d, *J* = 8.0 Hz, 2H), 7.63 (d, *J* = 8.0 Hz, 2H), 7.59 (d, *J* = 8.0 Hz, 2H), 7.55 (d, *J* = 8.0 Hz, 2H), 7.50-7.41 (m, 5H), 7.39-7.32 (m, 3H), 3.39 (t, *J* = 6.0 Hz, 2H), 3.15 (t, *J* = 8.0 Hz, 2H). <sup>13</sup>C{<sup>1</sup>H} NMR (100.6 MHz, CDCl<sub>3</sub>, 25 °C, ppm): δ = 198.7, 145.7, 141.0, 140.4, 139.8, 139.1, 135.5, 128.9, 128.8, 128.7, 128.6, 128.2, 127.2, 127.1, 127.0, 40.4, 29.8.

## References

- [1] Wang, R.; Ma, J.; Li, F. Synthesis of  $\alpha$ -Alkylated Ketones via Tandem Acceptorless Dehydrogenation/ $\alpha$ -Alkylation from Secondary and Primary Alcohols Catalyzed by Metal-Ligand Bifunctional Iridium Complex [Cp\*Ir(2,2'-bpyO)(H<sub>2</sub>O)]. *J. Org. Chem.* **2015**, *80*, 10769–10776.
- [2] Zhang, G.; Wu, J.; Zeng, H.; Zhang, S.; Yin, Z.; Zheng, S. Cobalt-Catalyzed  $\alpha$ -Alkylation of Ketones with Primary Alcohols. *Org. Lett.* **2017**, *19*, 1080–1083.
- [3] Li, F.; Ma, J.; Wang, N.  $\alpha$ -Alkylation of Ketones with Primary Alcohols Catalyzed by a Cp\*Ir Complex Bearing a Functional Bipyridonate Ligand. *J. Org. Chem.* **2014**, *79*, 10447–10455.

- [4] Piehl, P.; Peña-López, M.; Frey, A.; Neumann, H.; Beller, M. Hydrogen Autotransfer and Related Dehydrogenative Coupling Reactions Using a Rhenium (I) Pincer Catalyst. *Chem. Commun.* **2017**, *53*, 3265–3268.
- [5] Tan, D.-W.; Li, H.-X.; Li, H.-Y.; Young, D. J.; Yao, J.-L.; Lang, J.-P. Ligand-Controlled Copper(I)-Catalyzed Cross-Coupling of Secondary and Primary Alcohols to  $\alpha$ -Alkylated Ketones, Pyridines, and Quinolines. *Org. Lett.* **2018**, *20*, 608–611.
- [6] Zhang, M.-J.; Li, H.-X.; Young, D. J.; Li, H.-Y.; Lang, J.-P. Reaction Condition Controlled Nickel(II)-Catalyzed C–C Cross-Coupling of Alcohols. *Org. Biomol. Chem.* **2019**, *17*, 3567–3574.
- [7] Jafarpour, F.; Rajai-Daryasarei, S.; Gohari, M. H. Cascade Cyclization Versus Chemoselective Reduction: A Solvent-Controlled Product Divergence. *Org. Chem. Front.* **2020**, *7*, 3374–3381.
- [8] Vellakkaran, M.; Andappan, M. M. S.; Kommu, N. Replacing a Stoichiometric Silver Oxidant with Air: Ligated Pd(II)-catalysis to  $\beta$ -aryl Carbonyl Derivatives with Improved Chemoselectivity. *Green Chem.* **2014**, *16*, 2788–2797.
- [9] Cooper, A. K.; Leonard, D. K.; Bajo, S.; Burton, P. M.; Nelson, D. J. Aldehydes and Ketones Influence Reactivity and Selectivity in Nickel-Catalysed Suzuki–Miyaura Reactions. *Chem. Sci.* **2020**, *11*, 1905–1911.

# 1. Traces of $^1\text{H}$ and $^{13}\text{C}$ NMR spectra and HRMS analysis of complexes

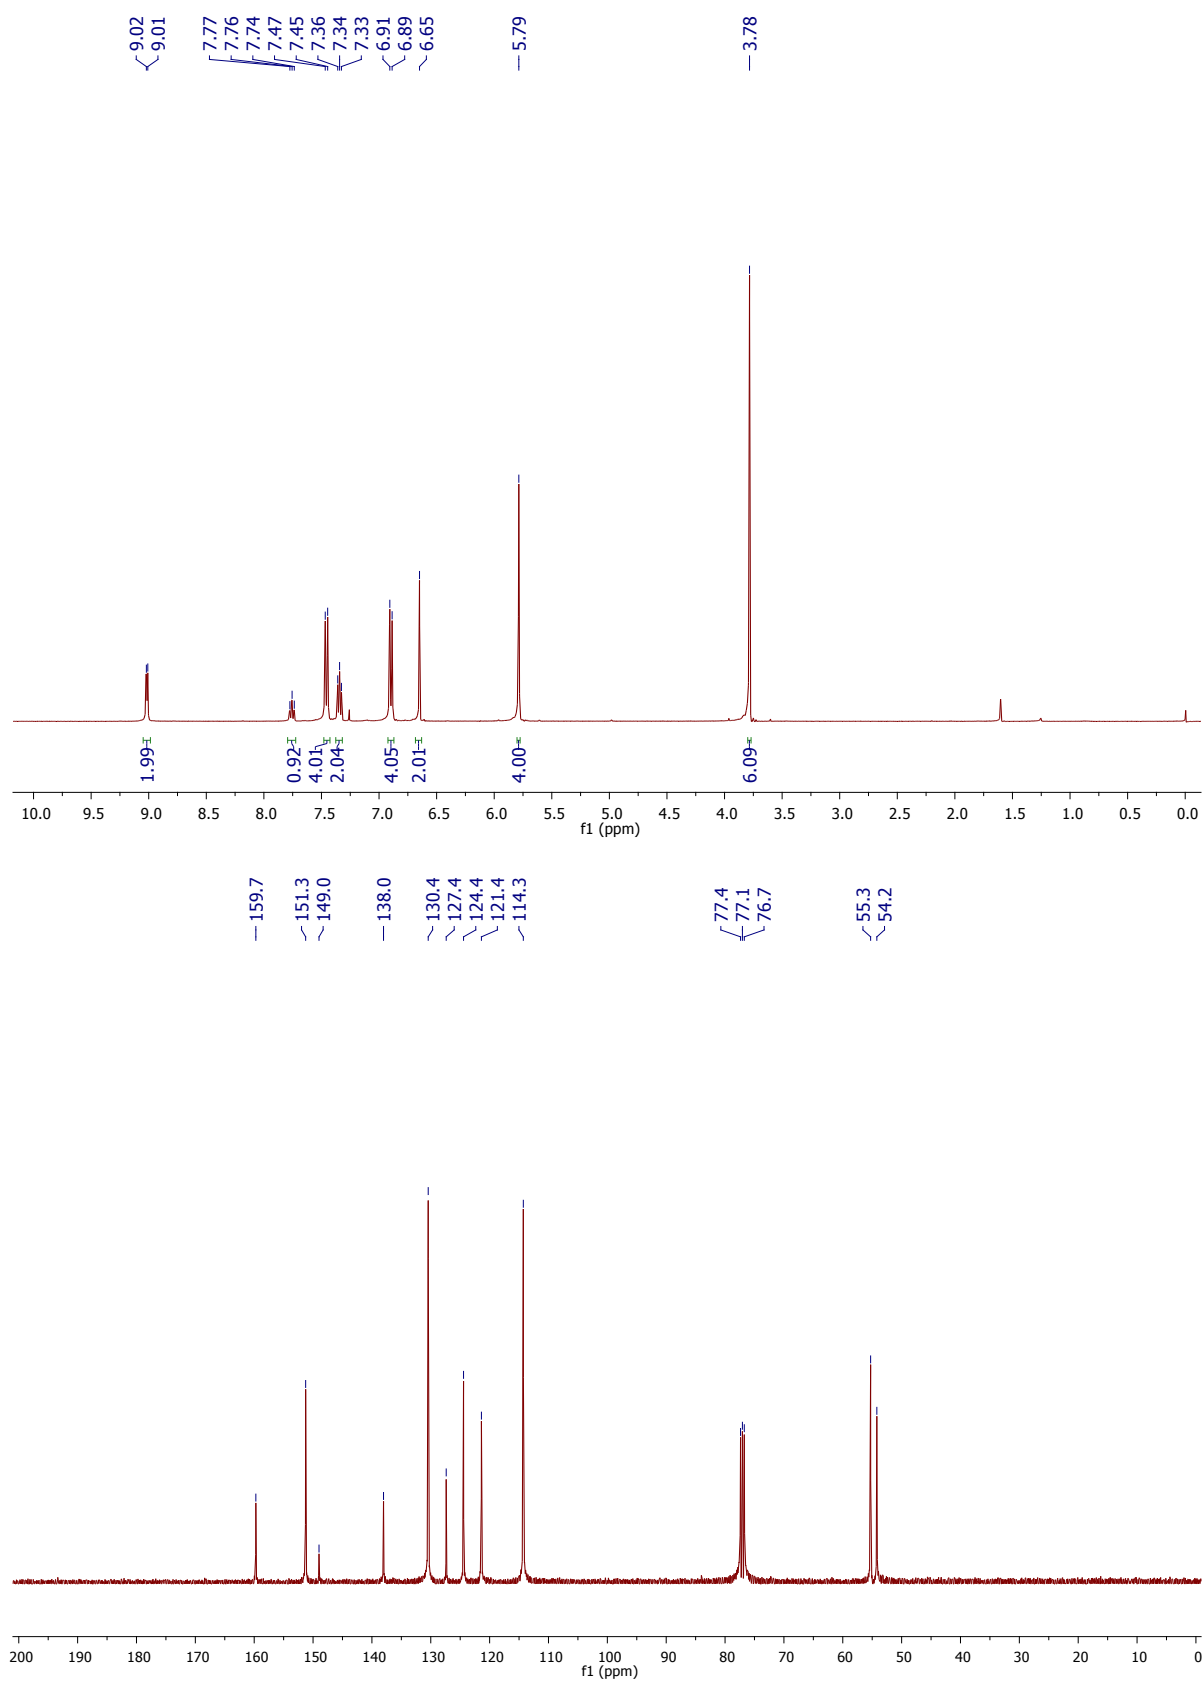

Figure S3.  $^1\text{H}$  and  $^{13}\text{C}$  NMR spectra of compound 2a.



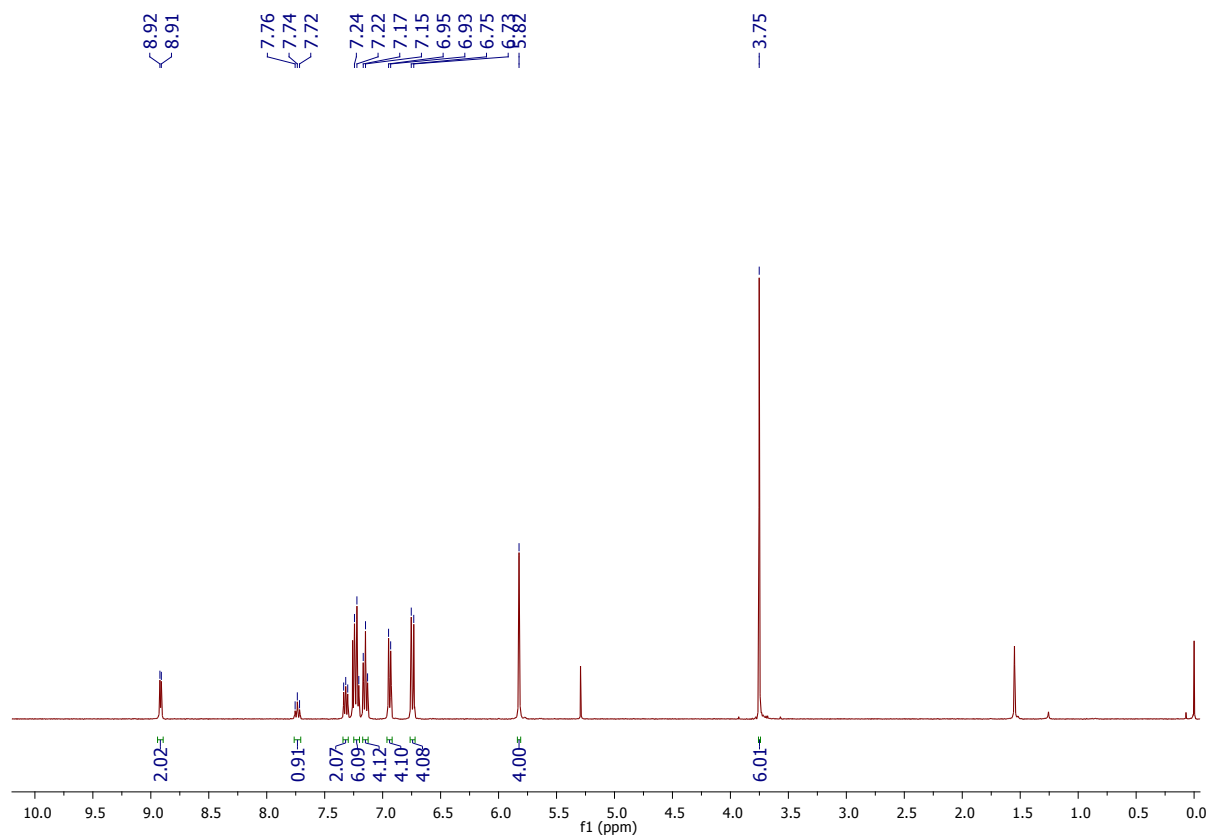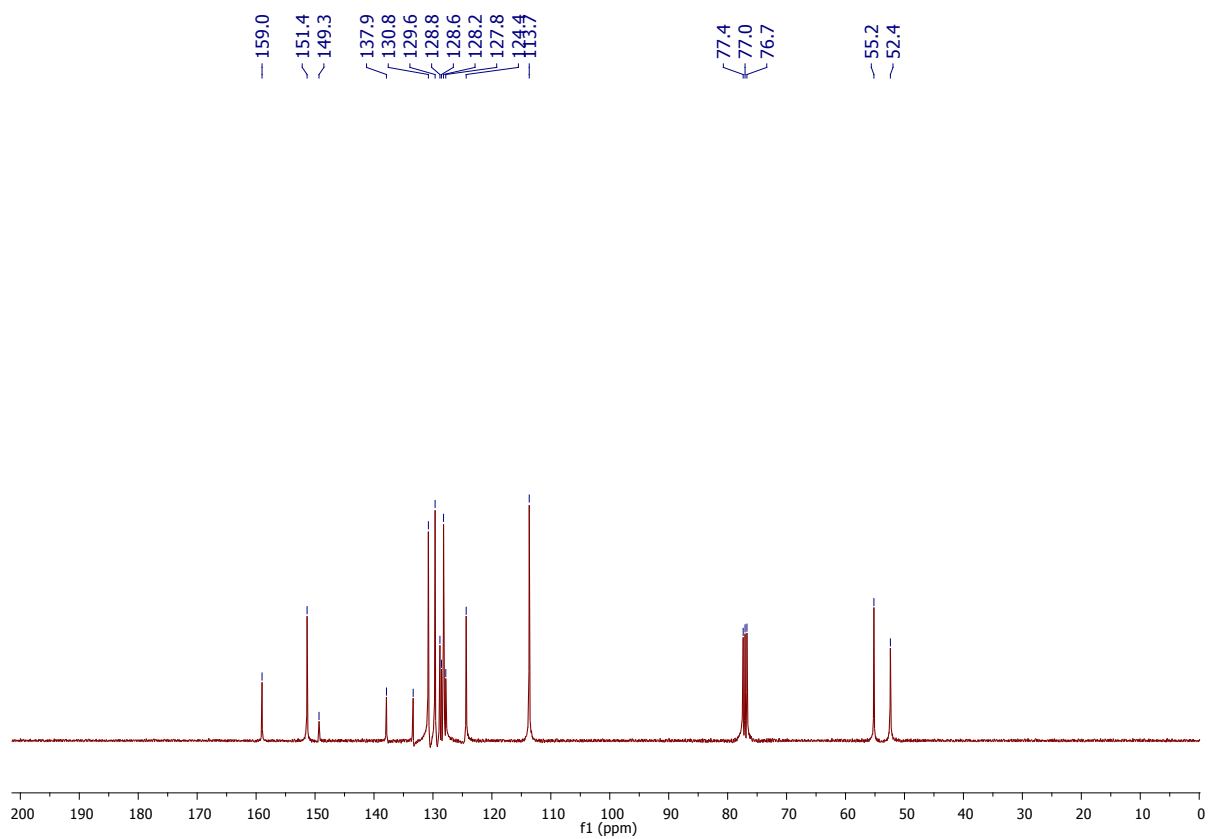

**Figure S4.** <sup>1</sup>H and <sup>13</sup>C NMR spectra of compound **2b**.

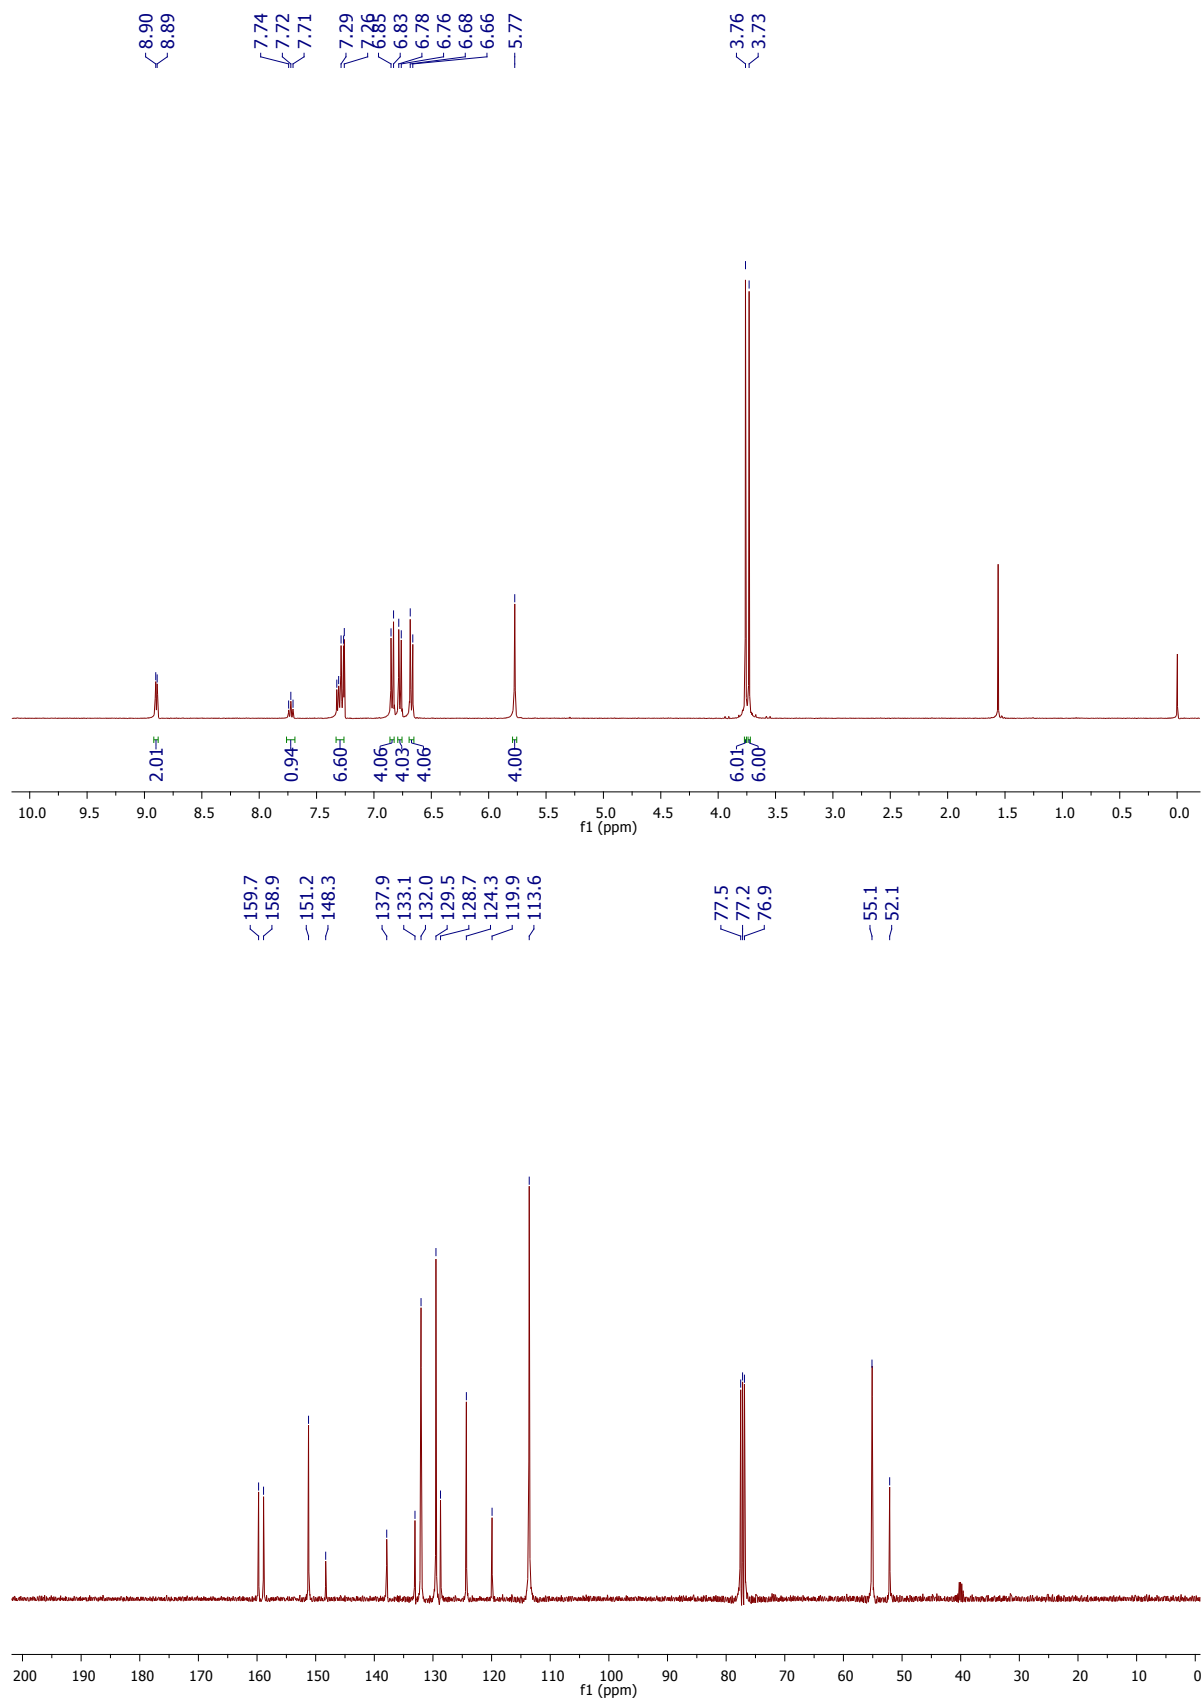

**Figure S5.** <sup>1</sup>H and <sup>13</sup>C NMR spectra of compound **2c**.

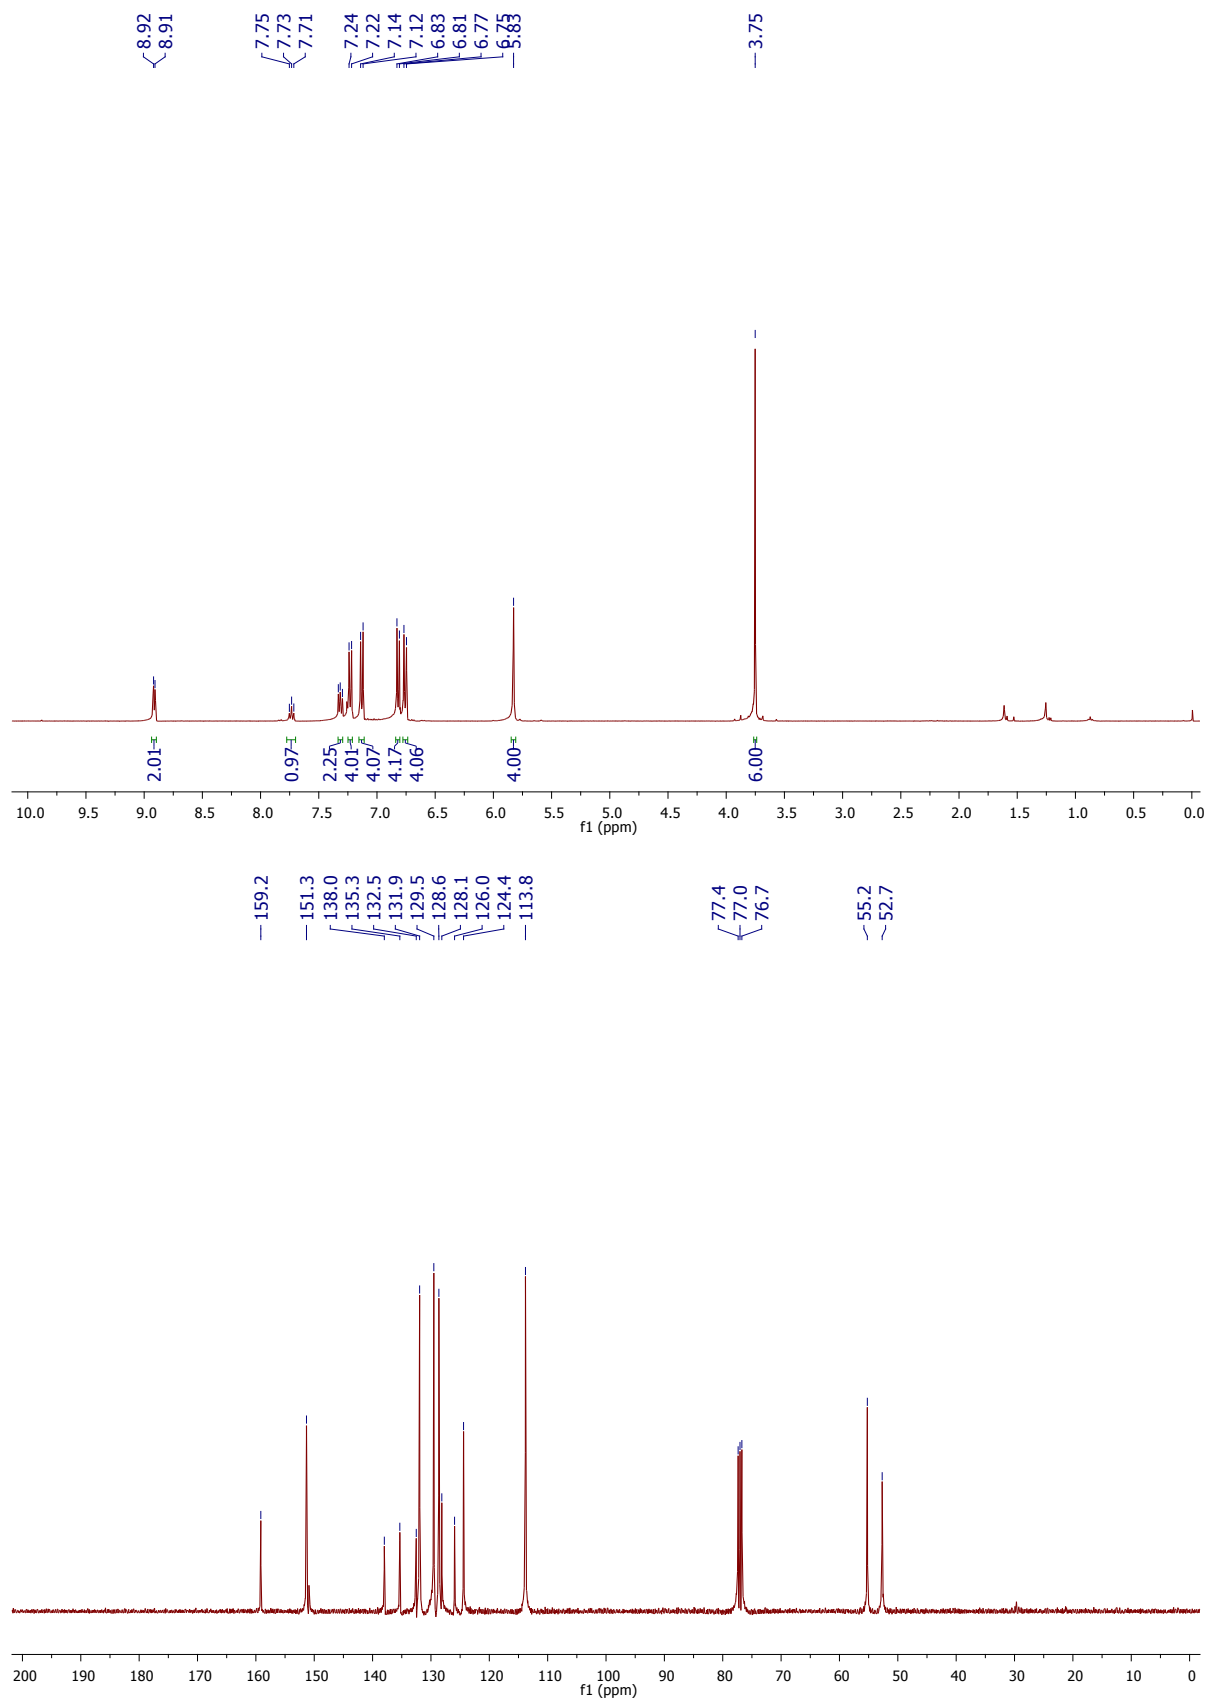

**Figure S6.** <sup>1</sup>H and <sup>13</sup>C NMR spectra of compound **2d**.

### User Spectra

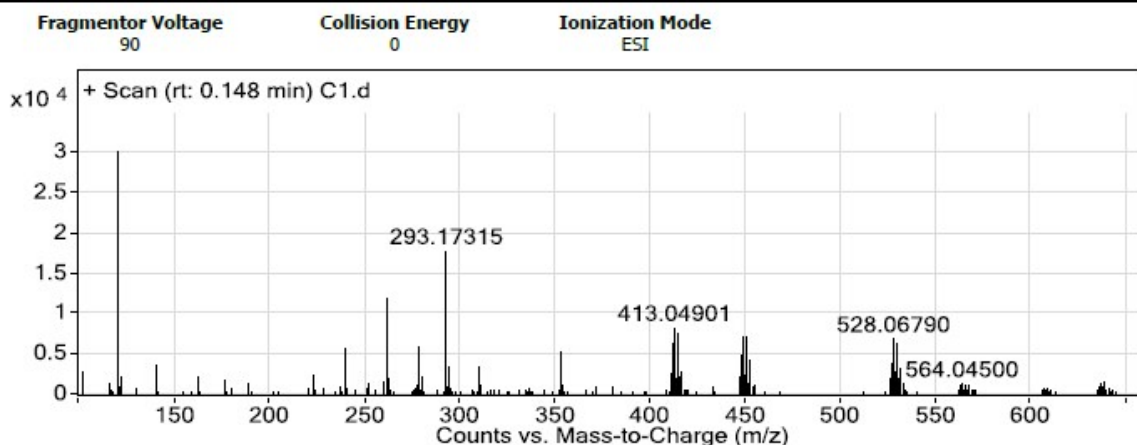

Figure S7. HRMS analysis report of compound 2a.

### User Spectra

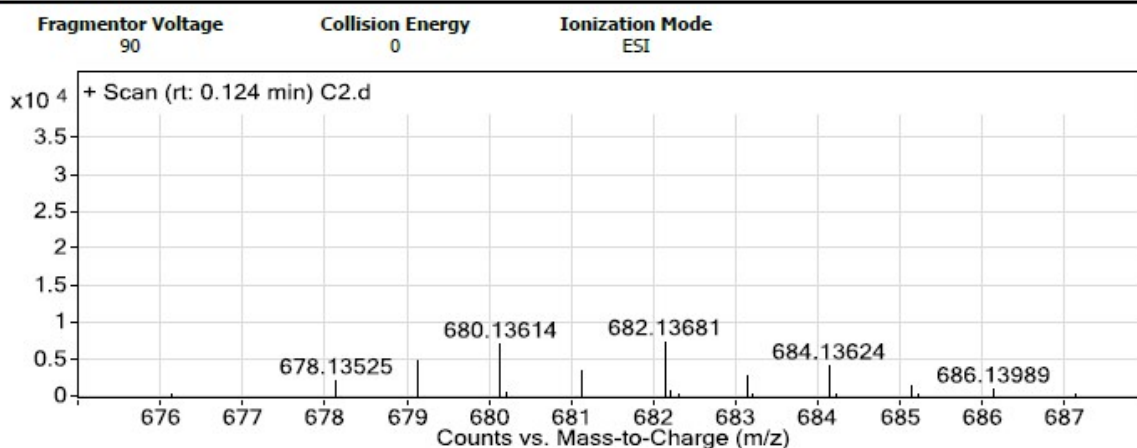

Figure S8. HRMS analysis report of compound 2b.

### User Spectra

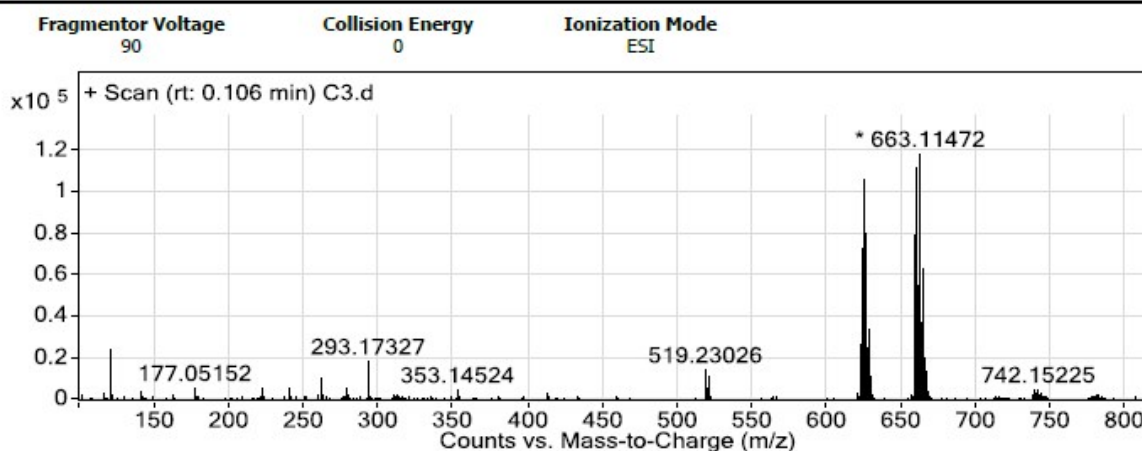

Figure S9. HRMS analysis report of compound 2c.

## User Spectra

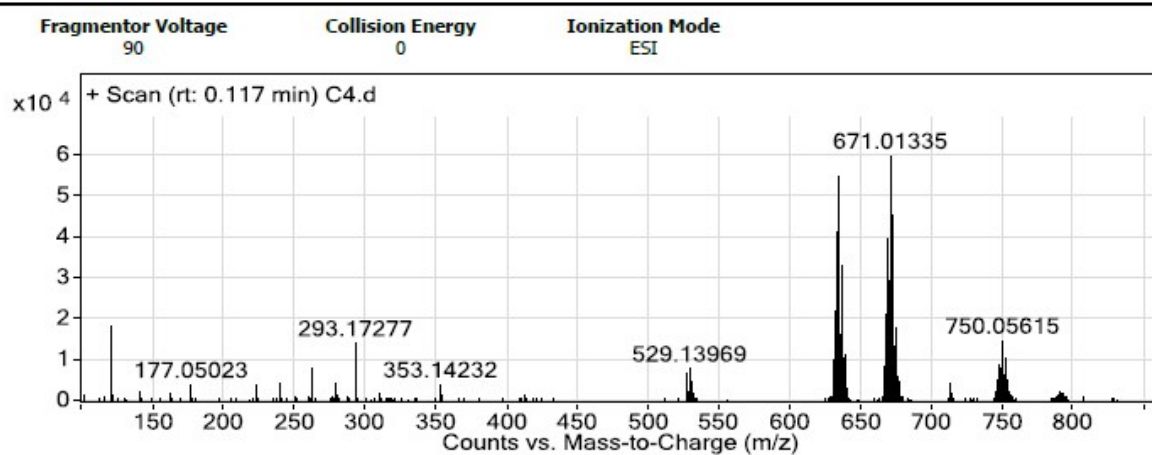

**Figure S10.** HRMS analysis report of compound **2d**.

## 2. Traces of $^1\text{H}$ and $^{13}\text{C}$ NMR spectra of products

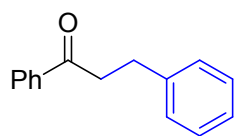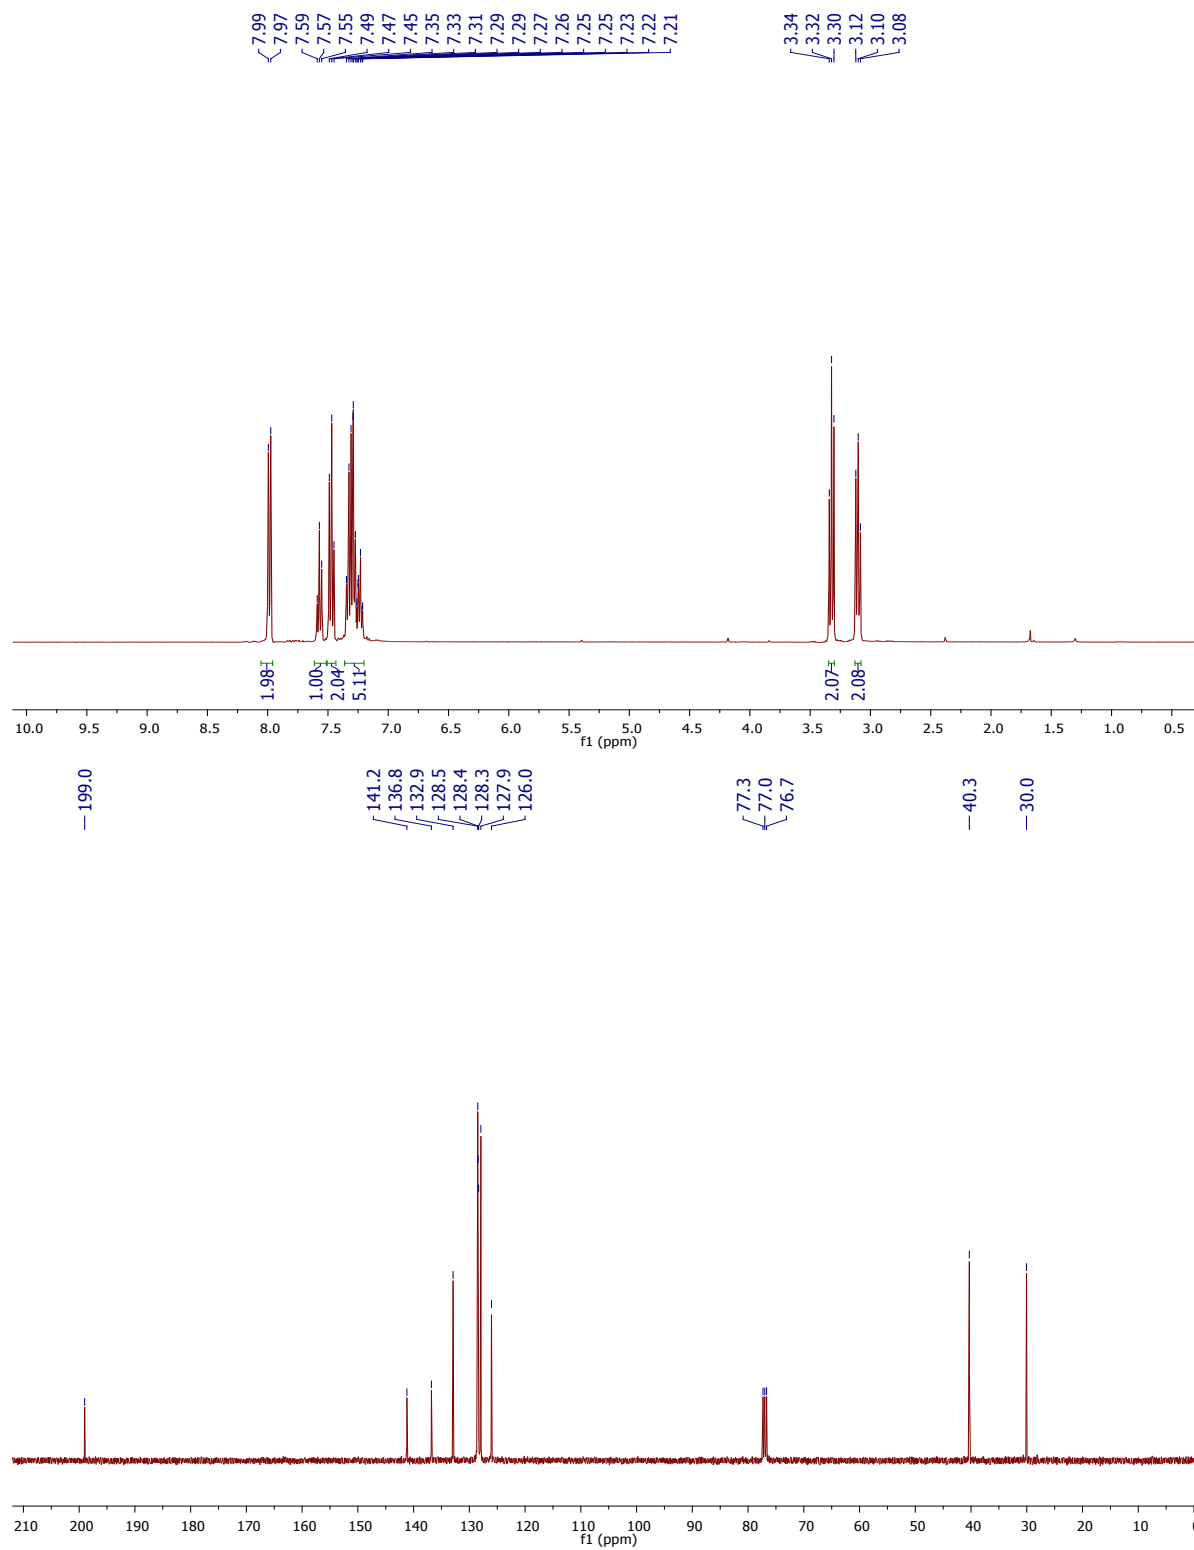

Figure S11.  $^1\text{H}$  and  $^{13}\text{C}$  NMR spectra of 5a.

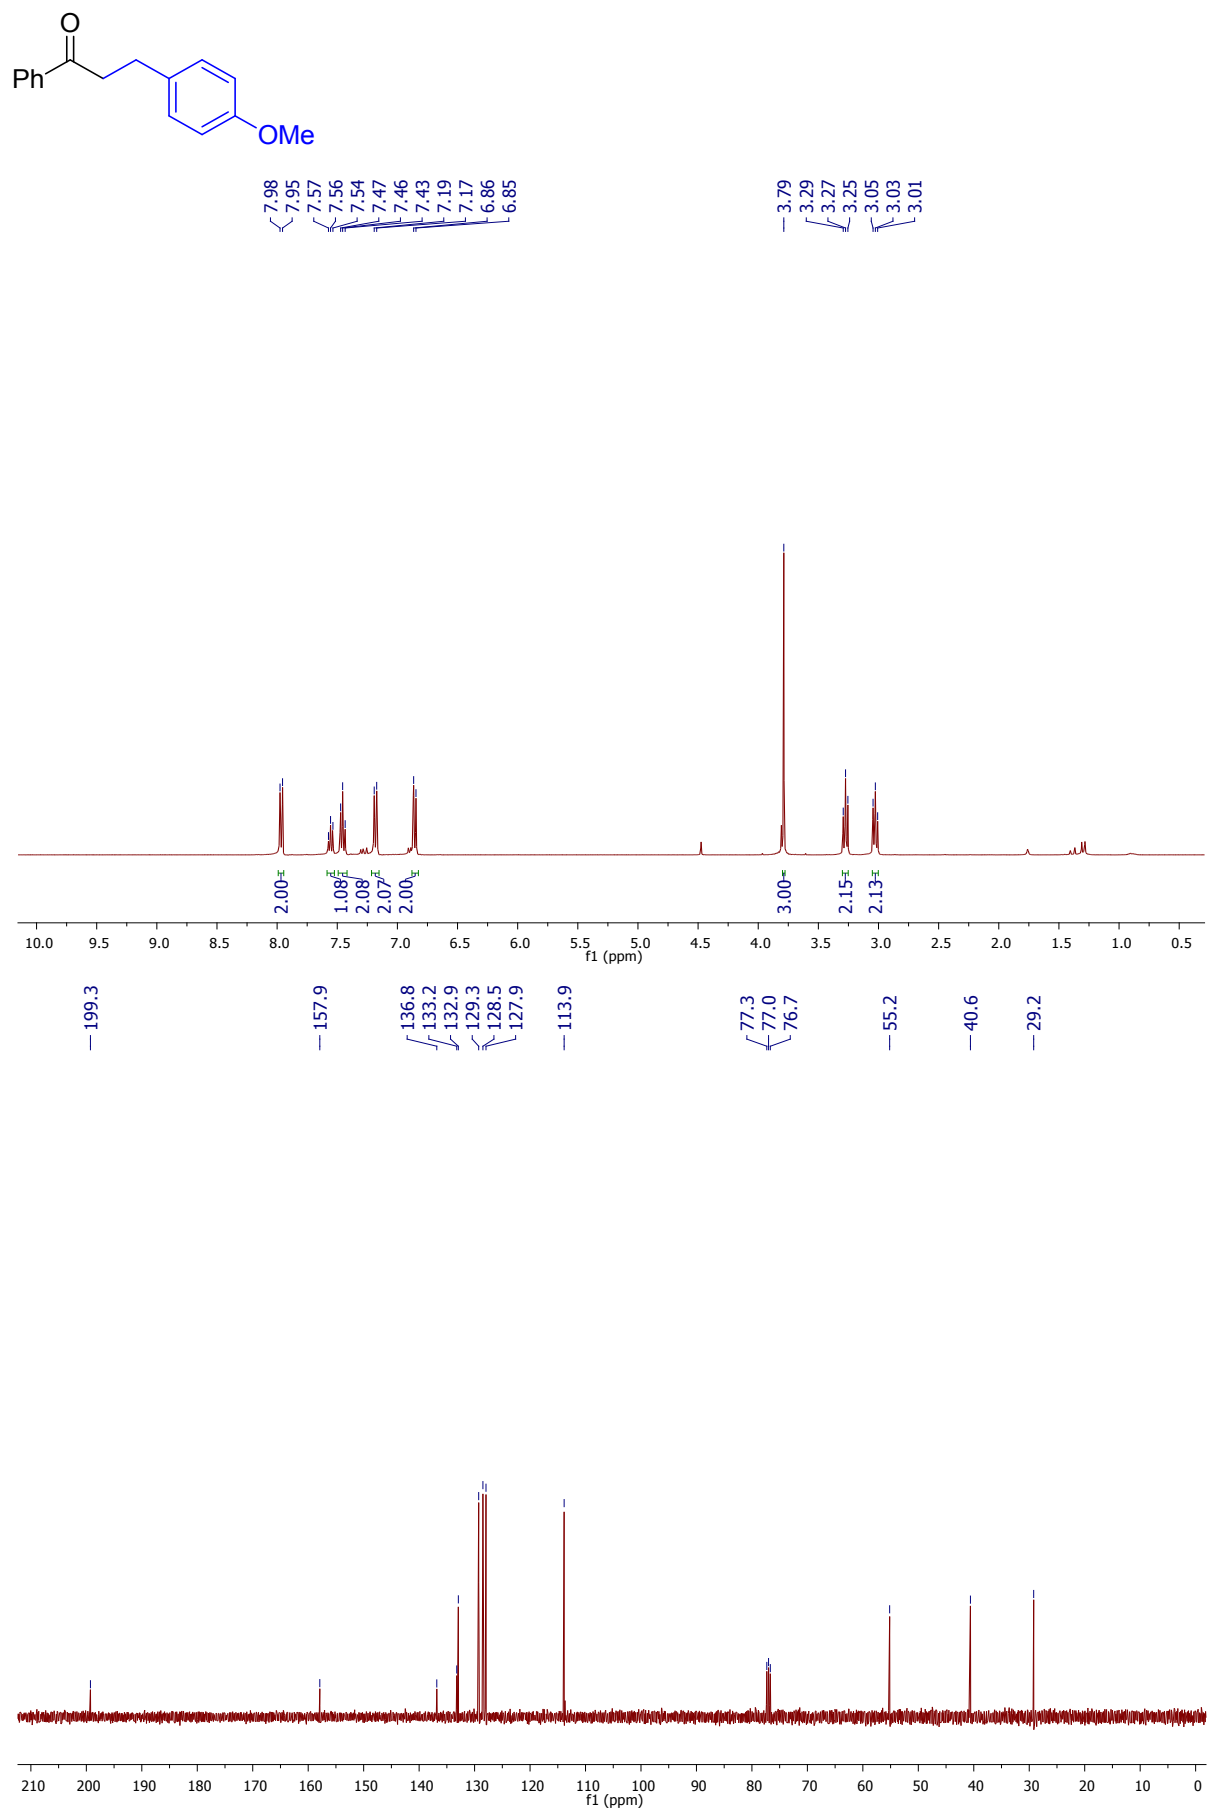

Figure S12. <sup>1</sup>H and <sup>13</sup>C NMR spectra of **5b**.

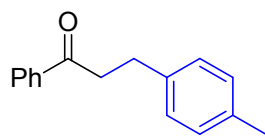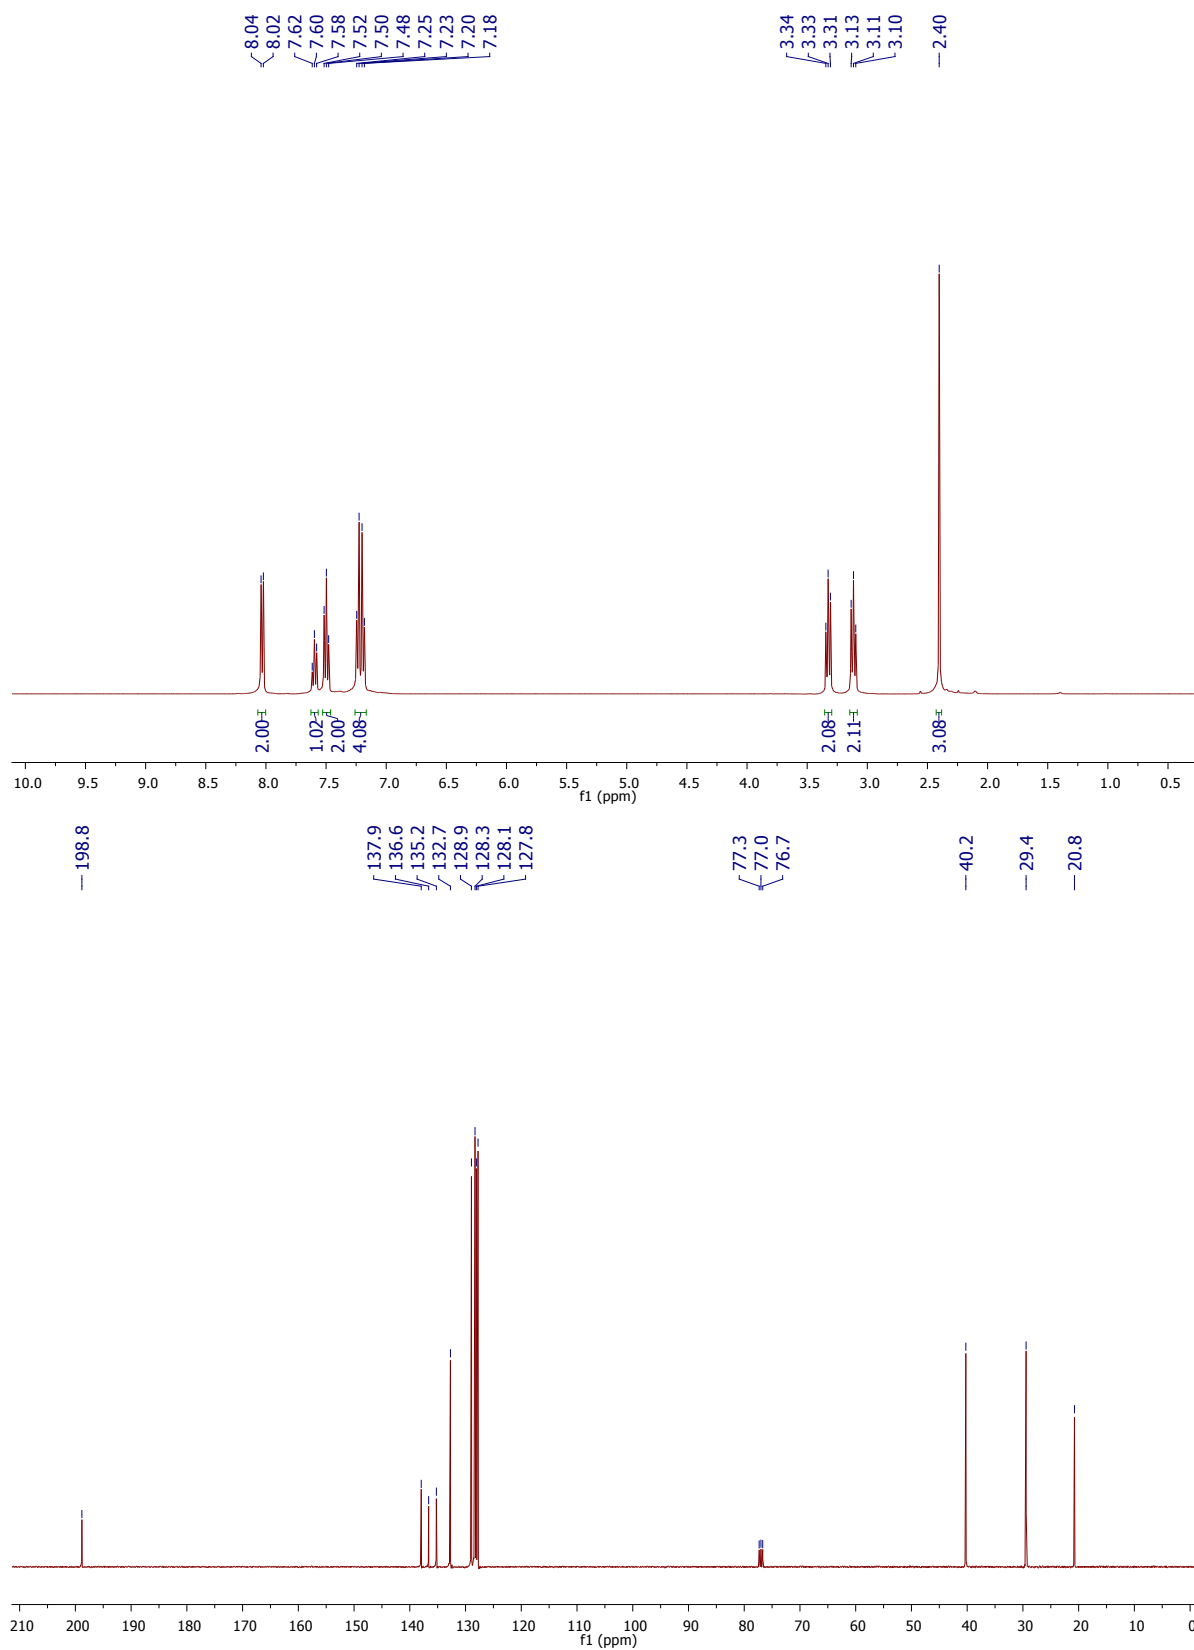

Figure S13. <sup>1</sup>H and <sup>13</sup>C NMR spectra of 5c.



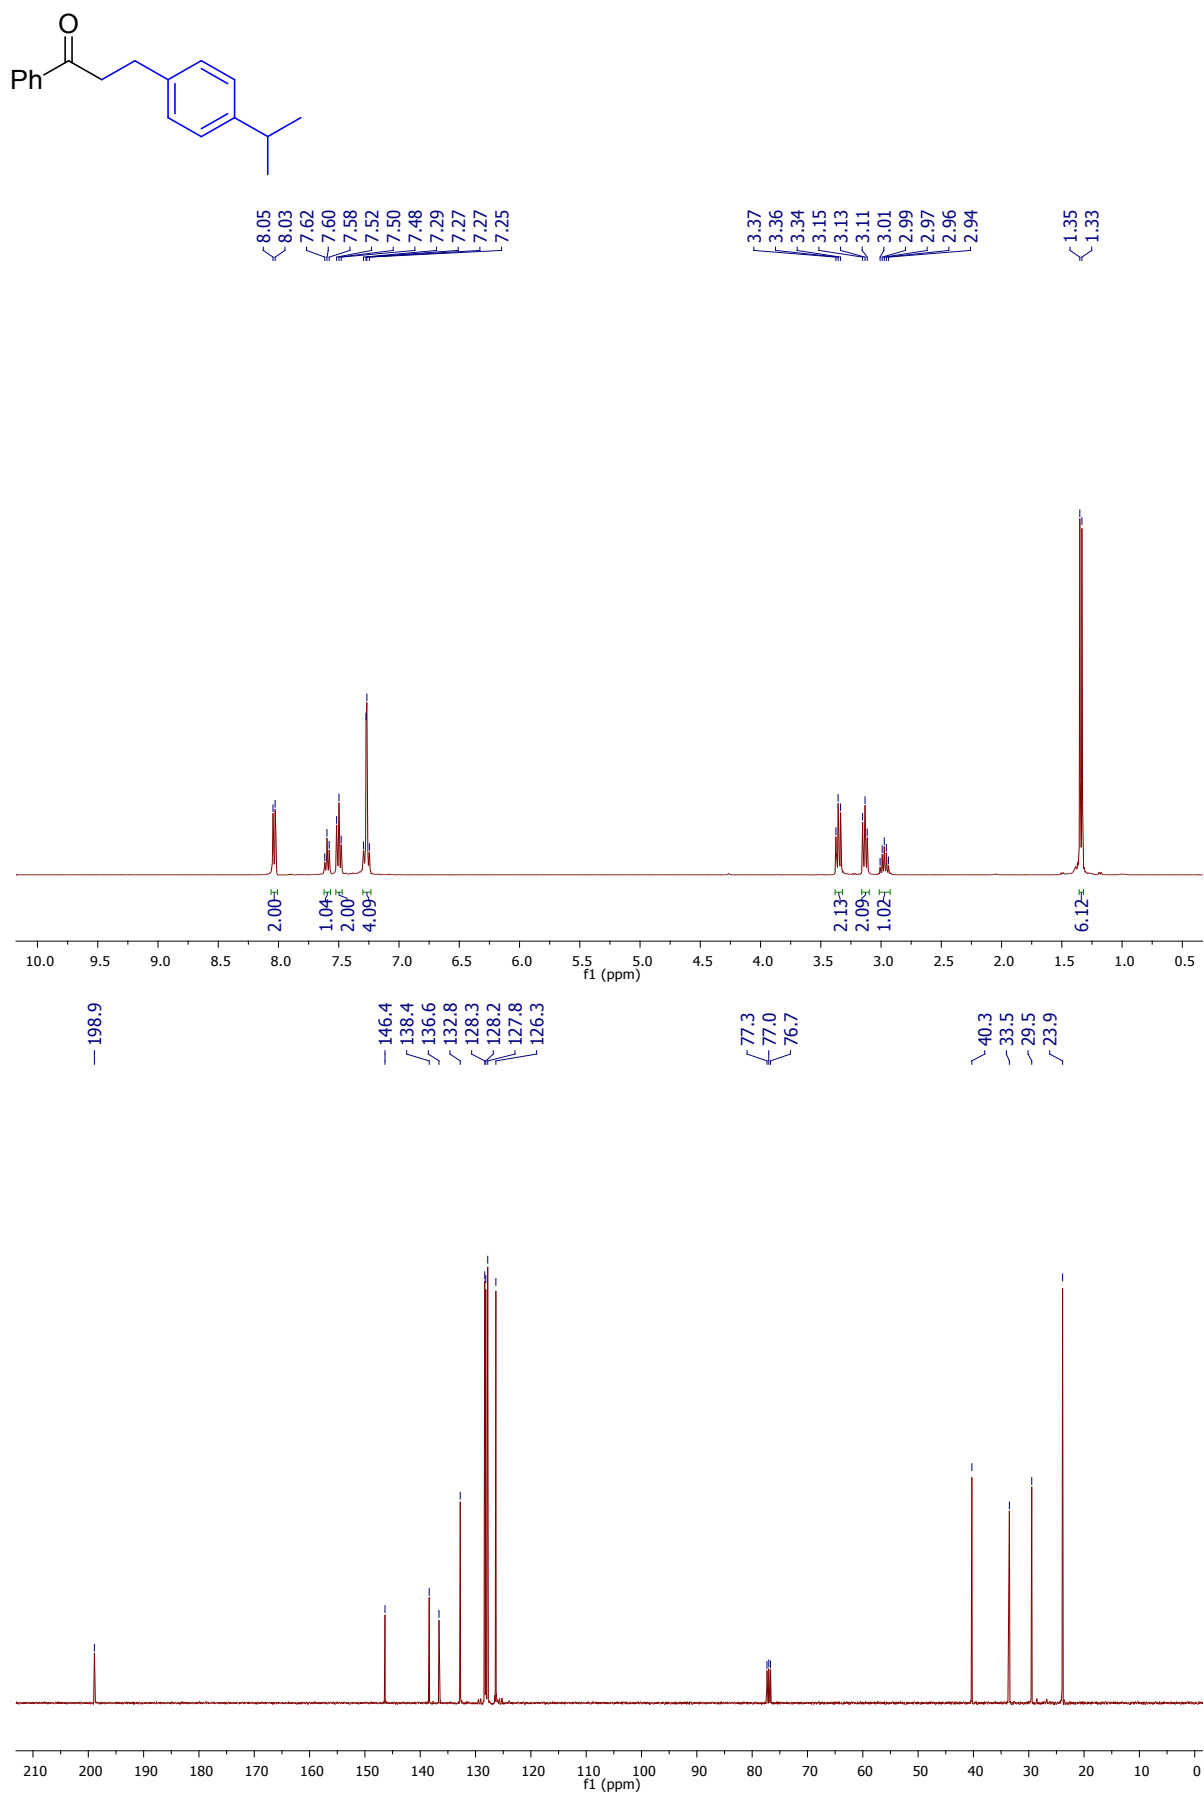

**Figure S14.** <sup>1</sup>H and <sup>13</sup>C NMR spectra of **5d**.

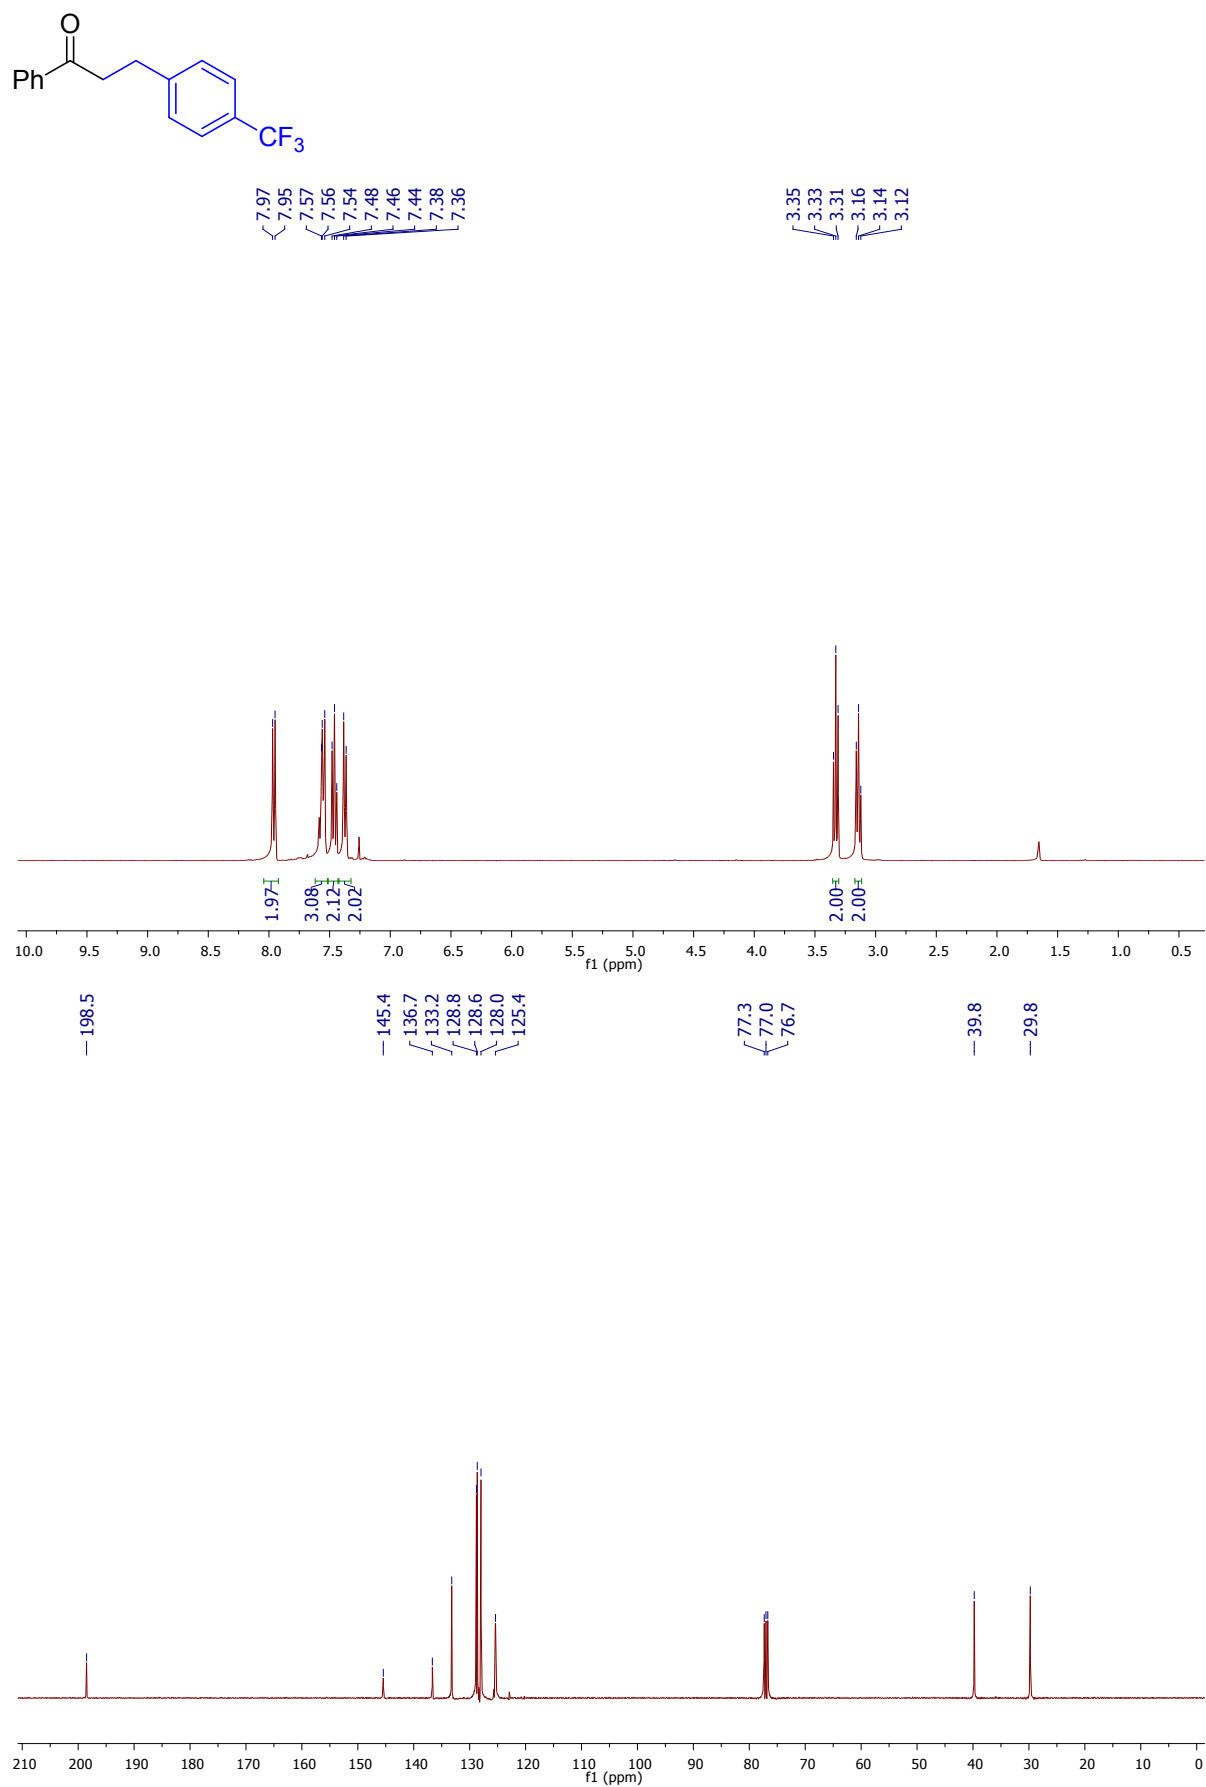

**Figure S15.** <sup>1</sup>H and <sup>13</sup>C NMR spectra of **5e**.

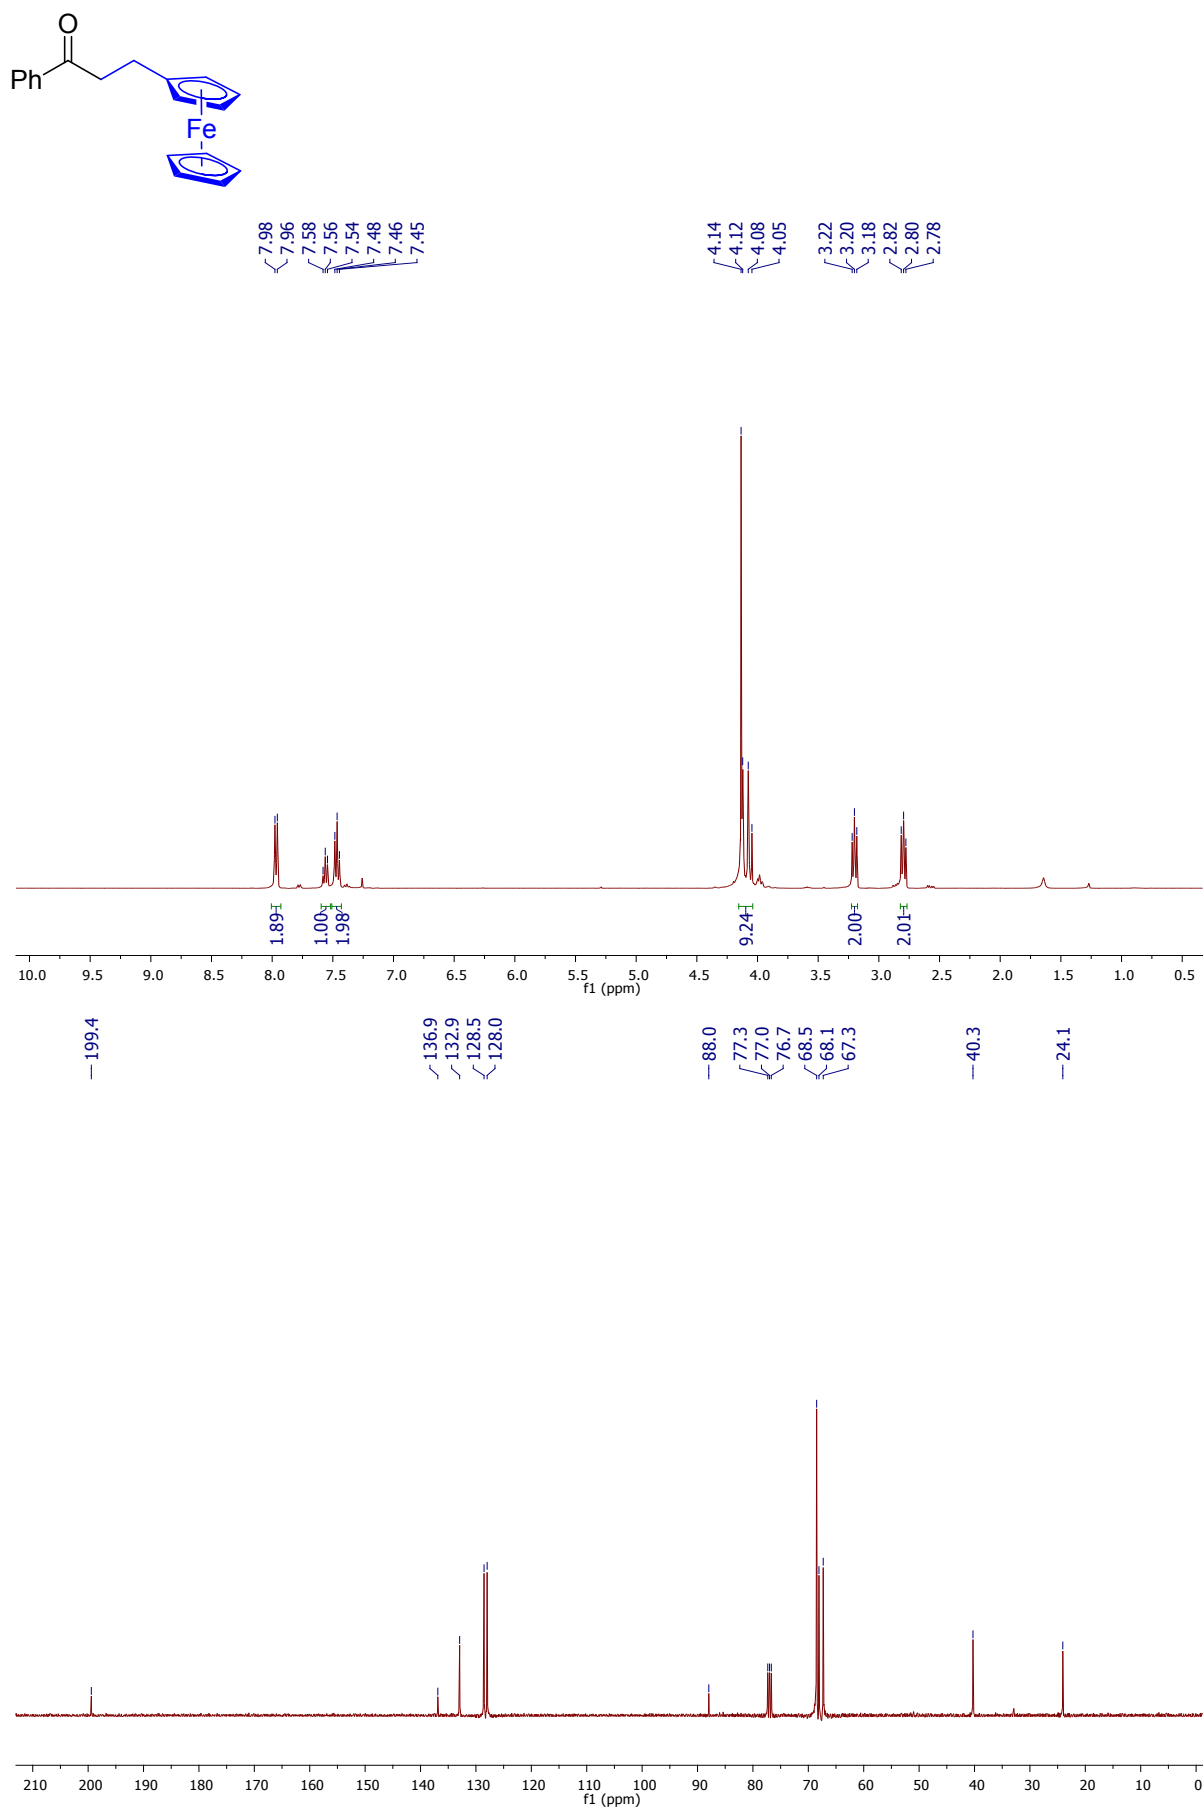

**Figure S16.** <sup>1</sup>H and <sup>13</sup>C NMR spectra of **5h**.

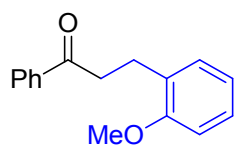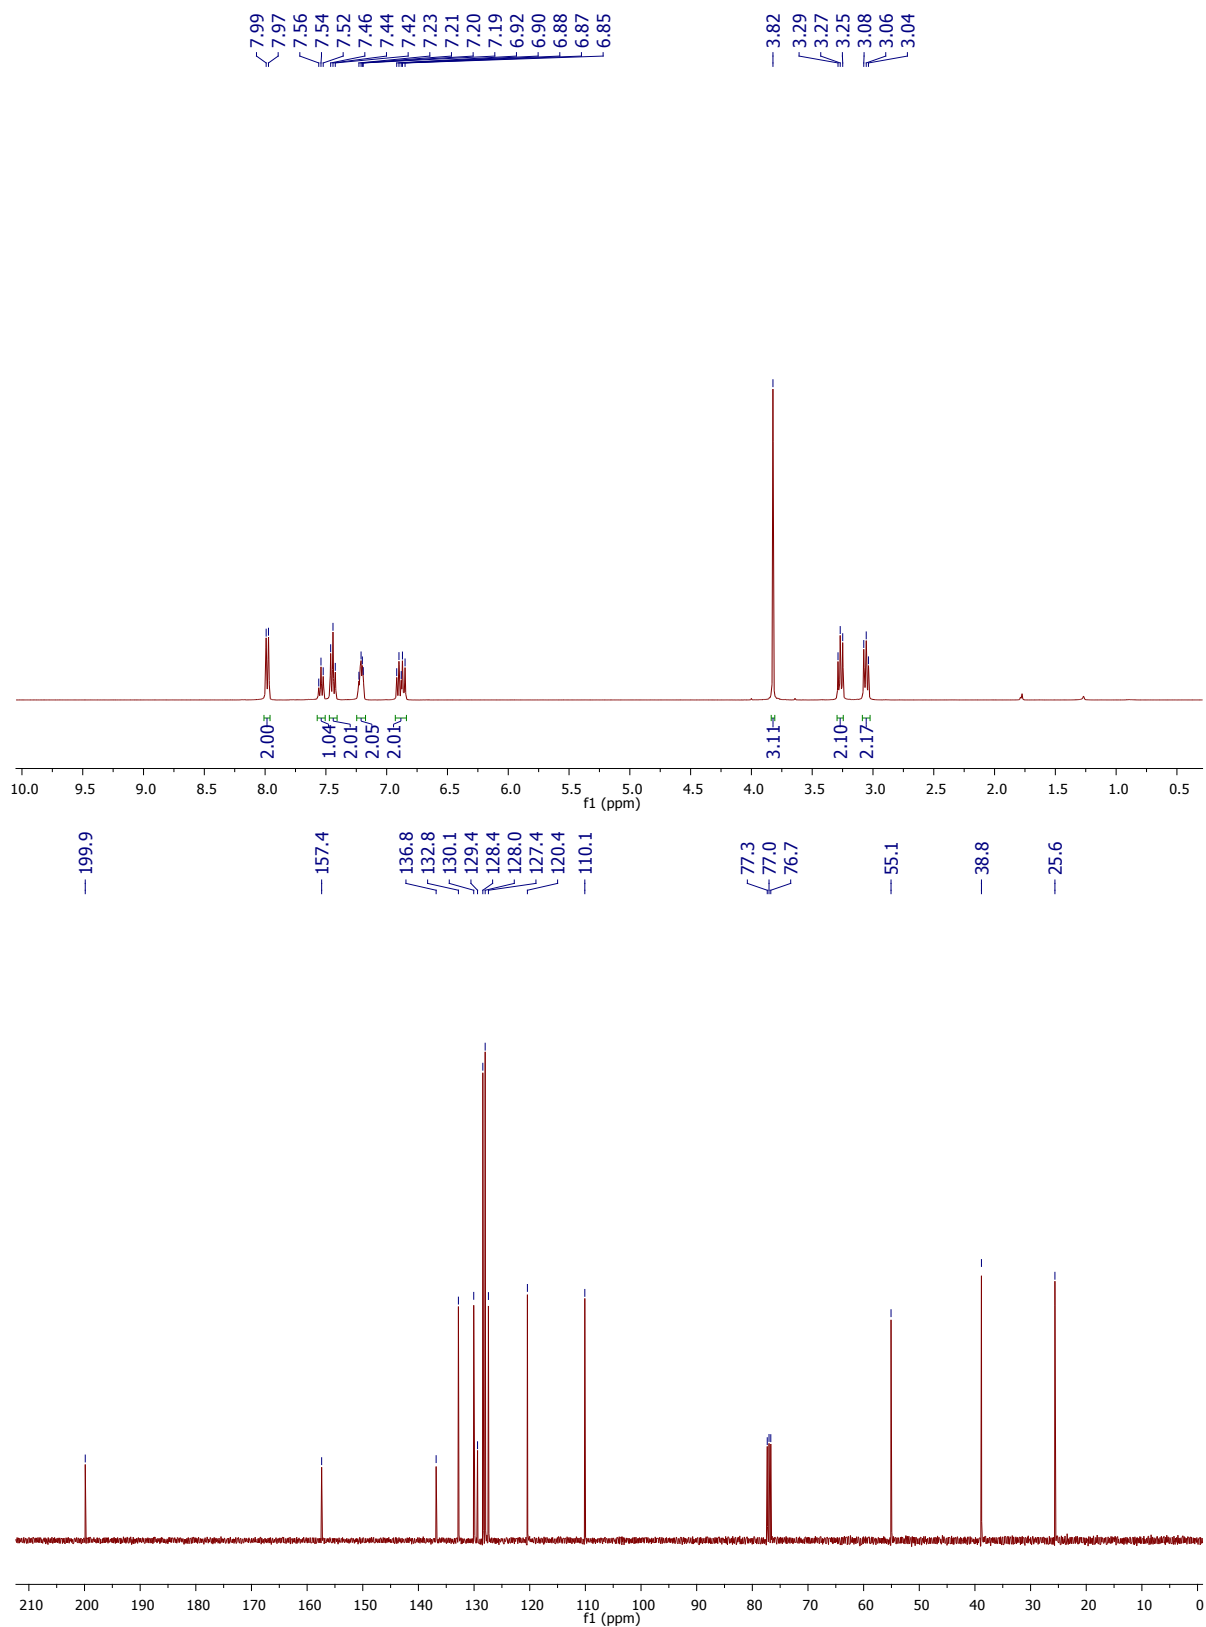

Figure S17. <sup>1</sup>H and <sup>13</sup>C NMR spectra of 5i.

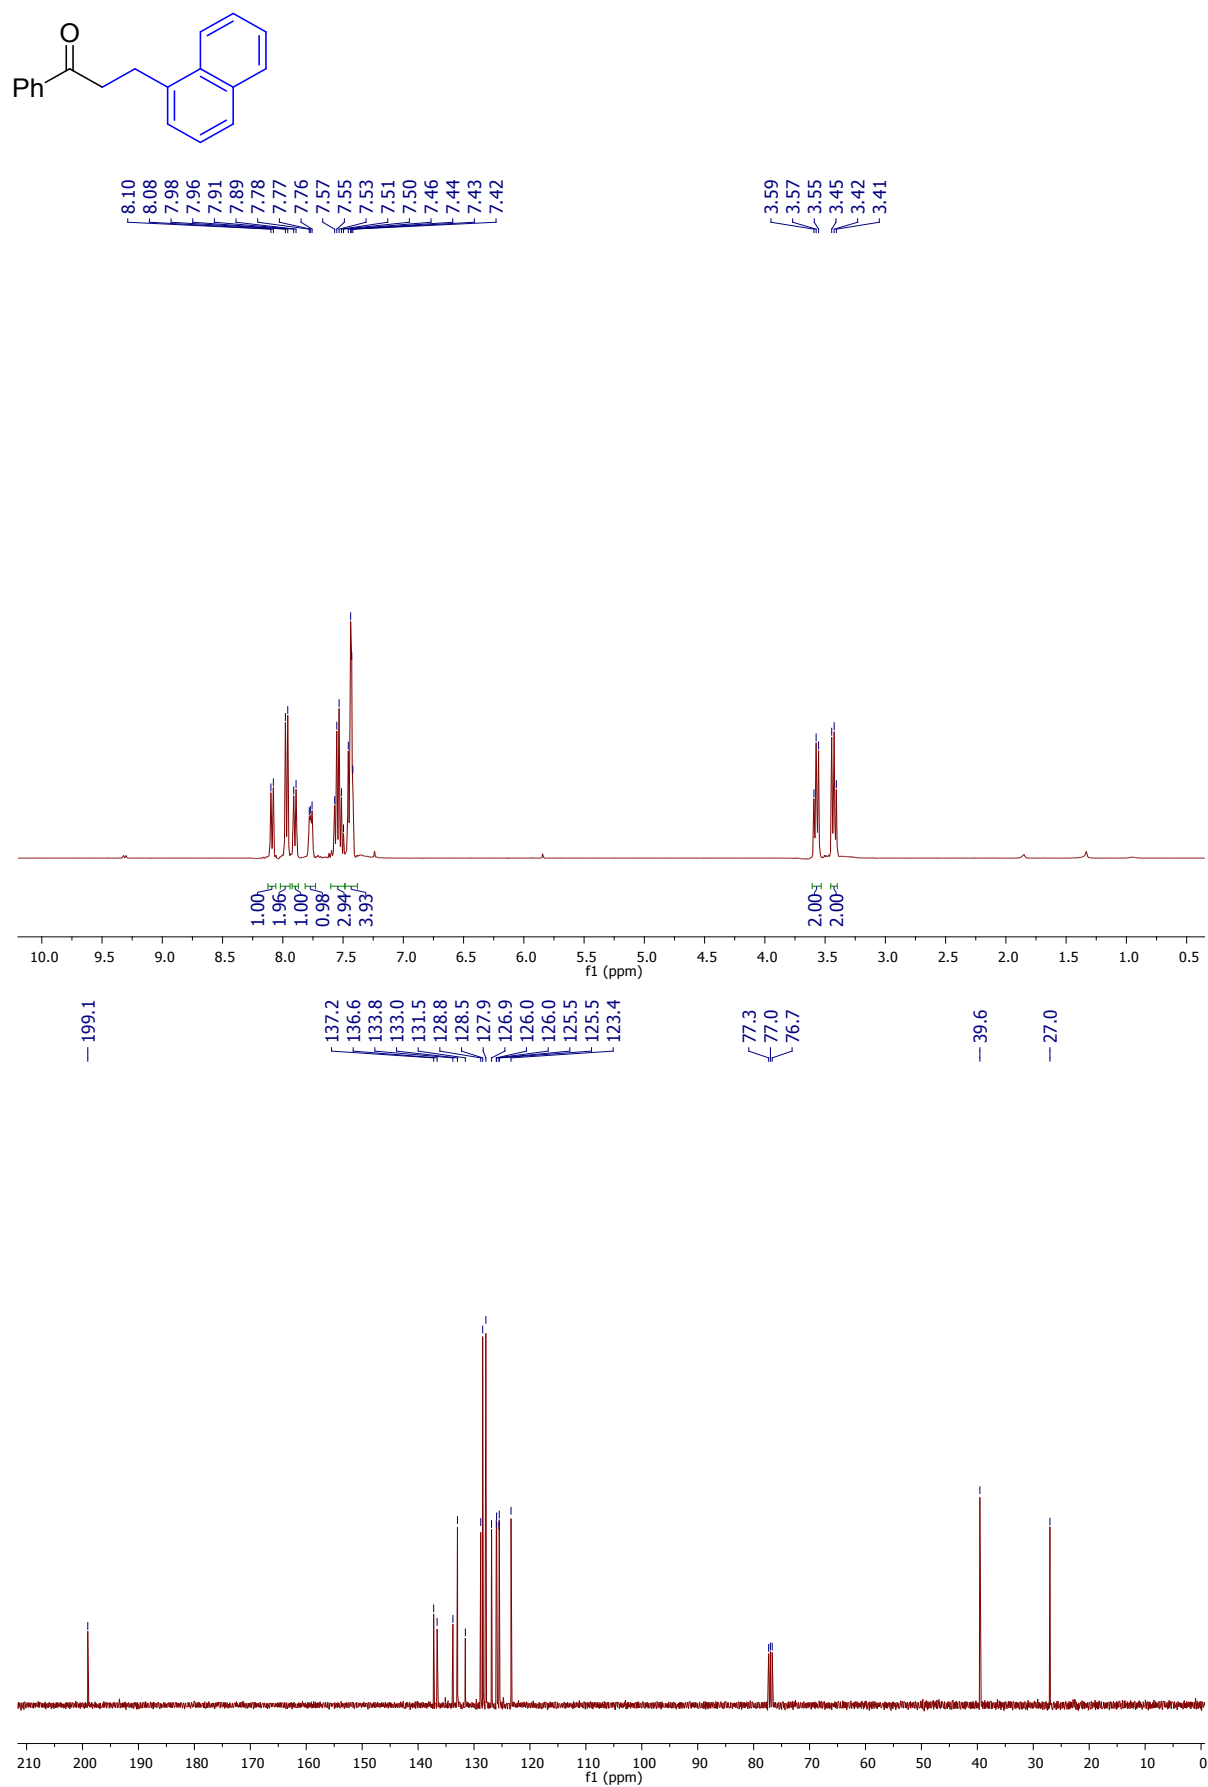

**Figure S18.** <sup>1</sup>H and <sup>13</sup>C NMR spectra of **5j**.

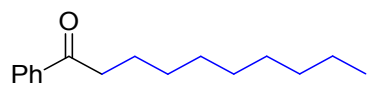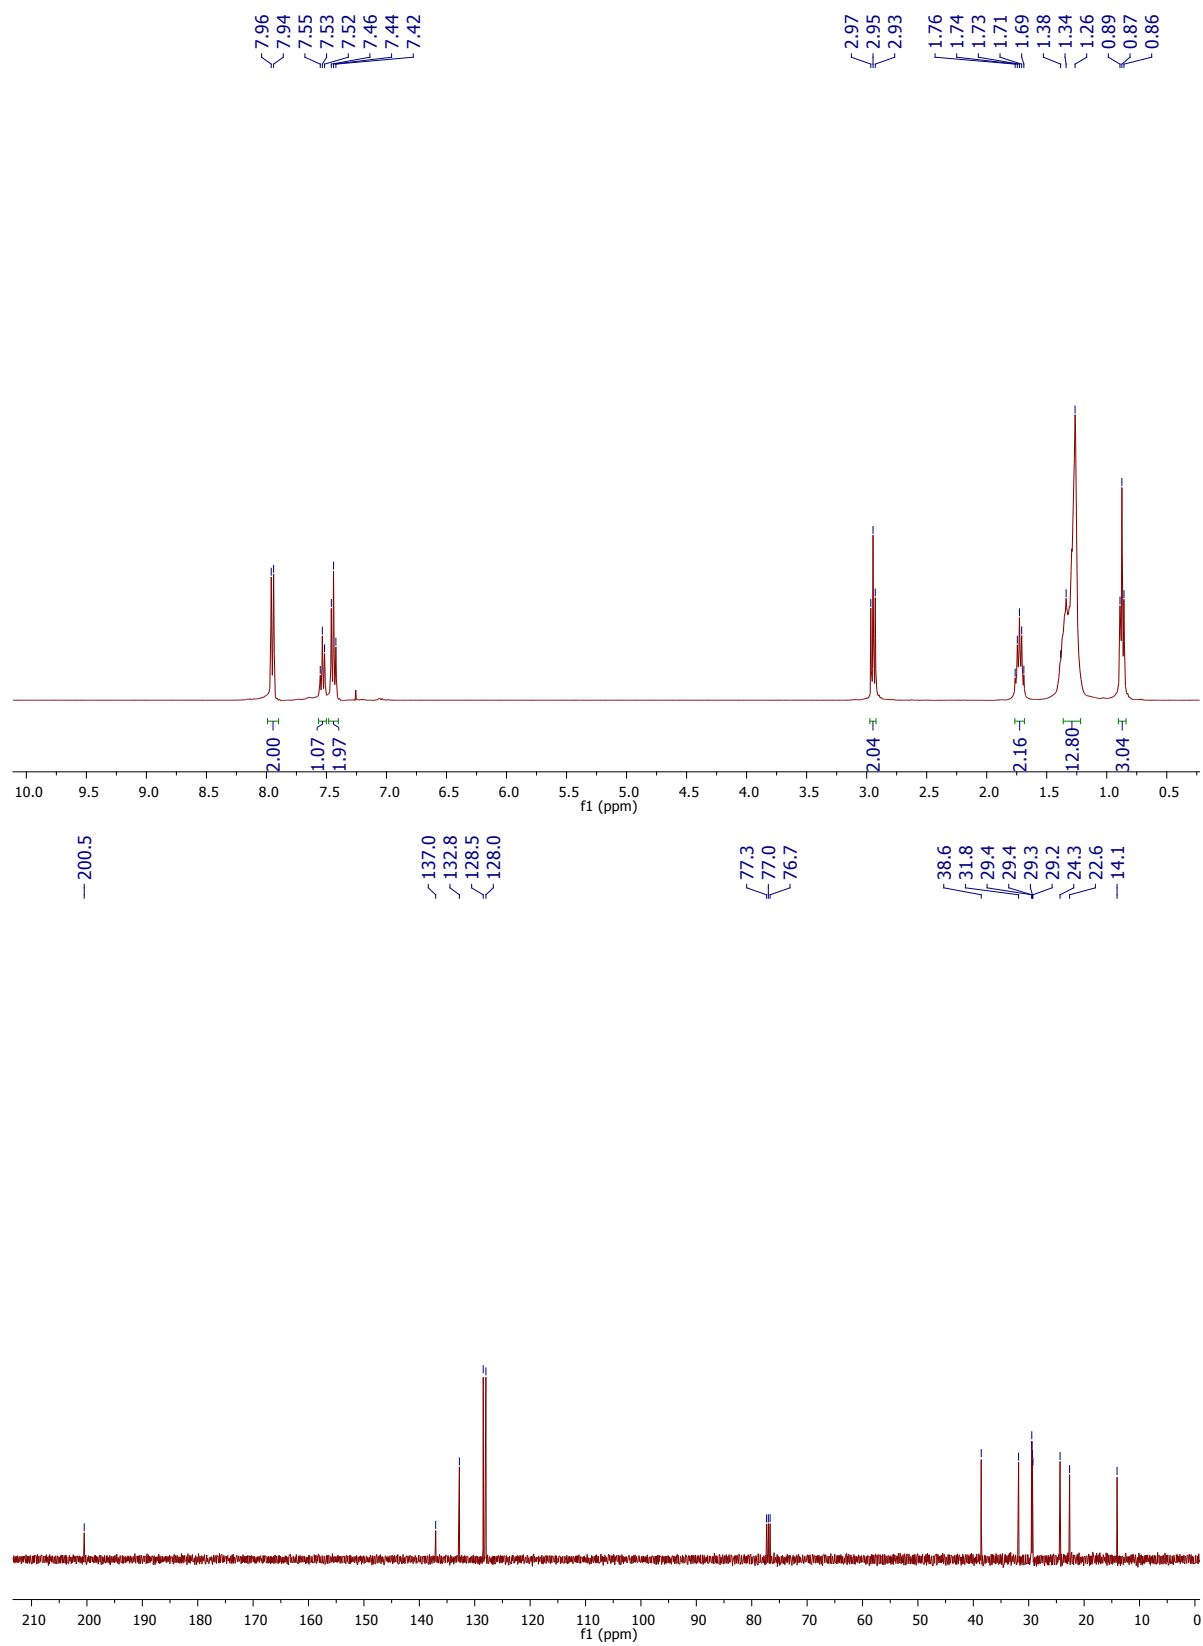

Figure S19. <sup>1</sup>H and <sup>13</sup>C NMR spectra of 5k.

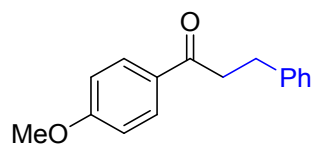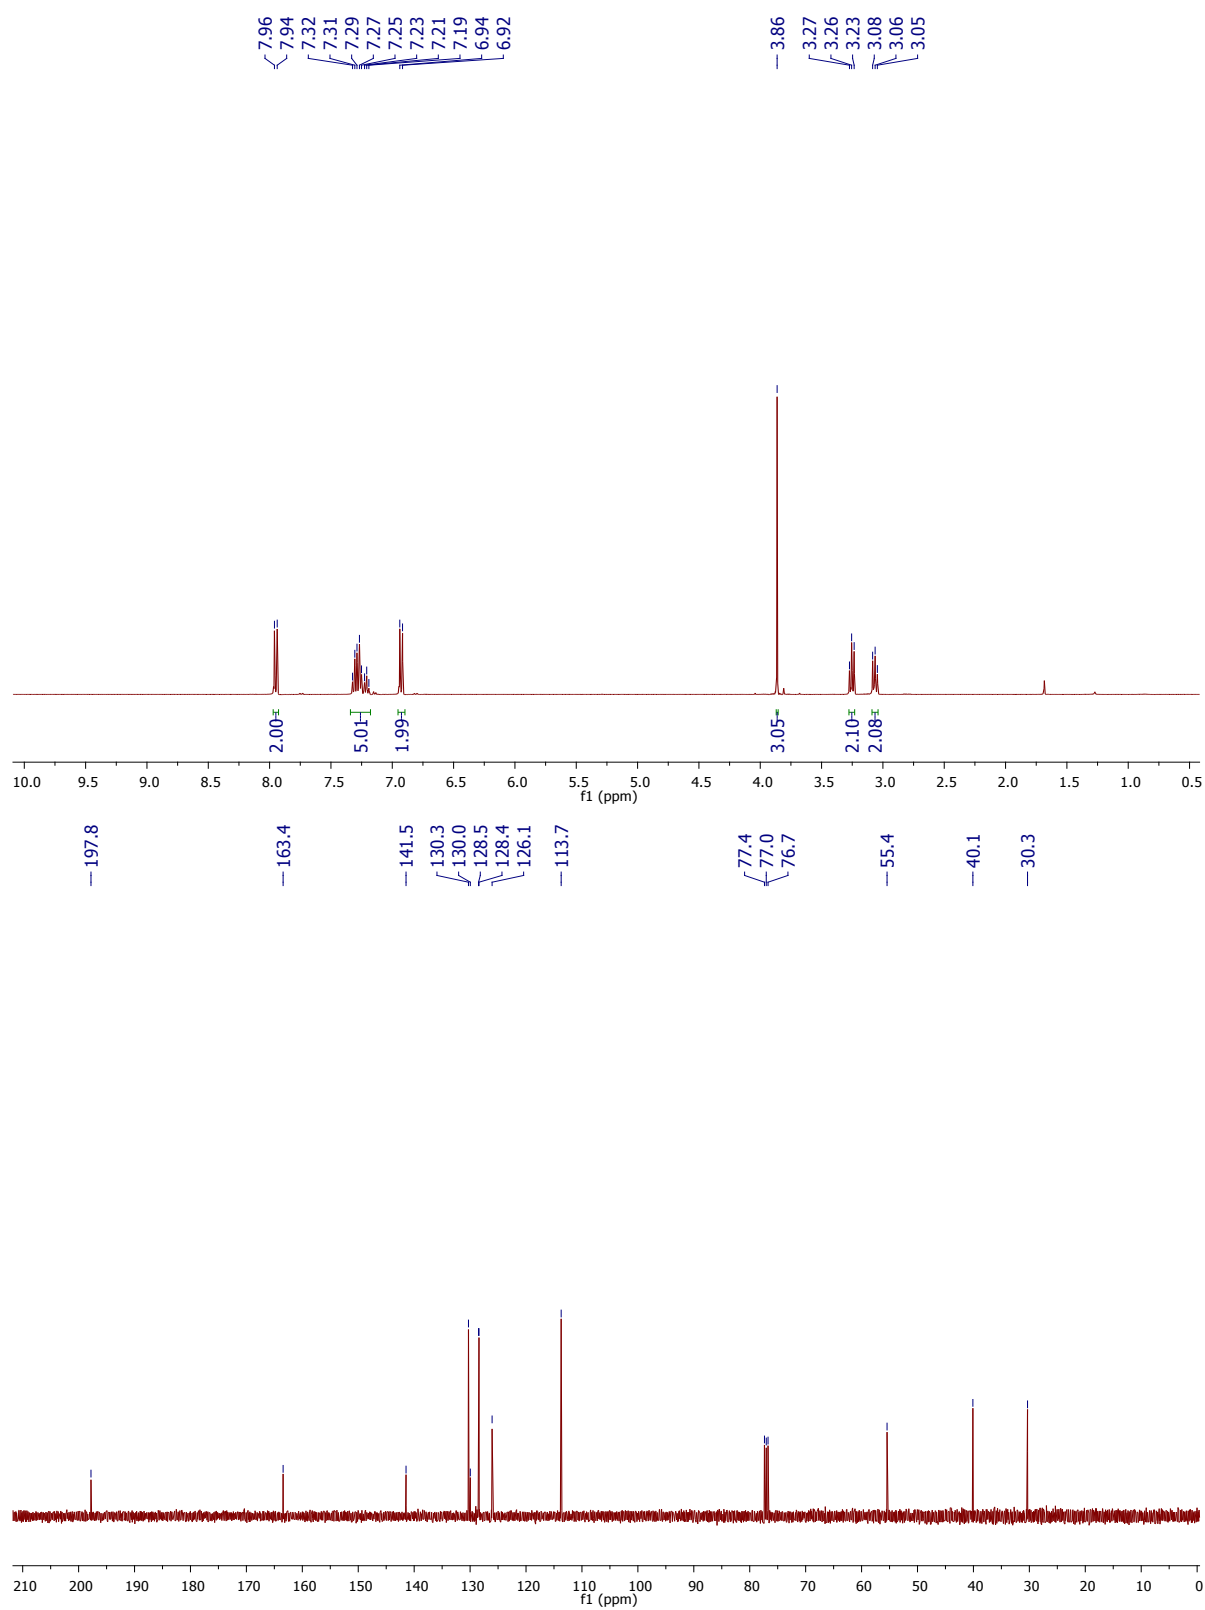

Figure S20. <sup>1</sup>H and <sup>13</sup>C NMR spectra of 51.

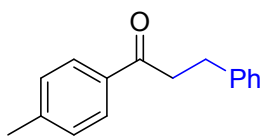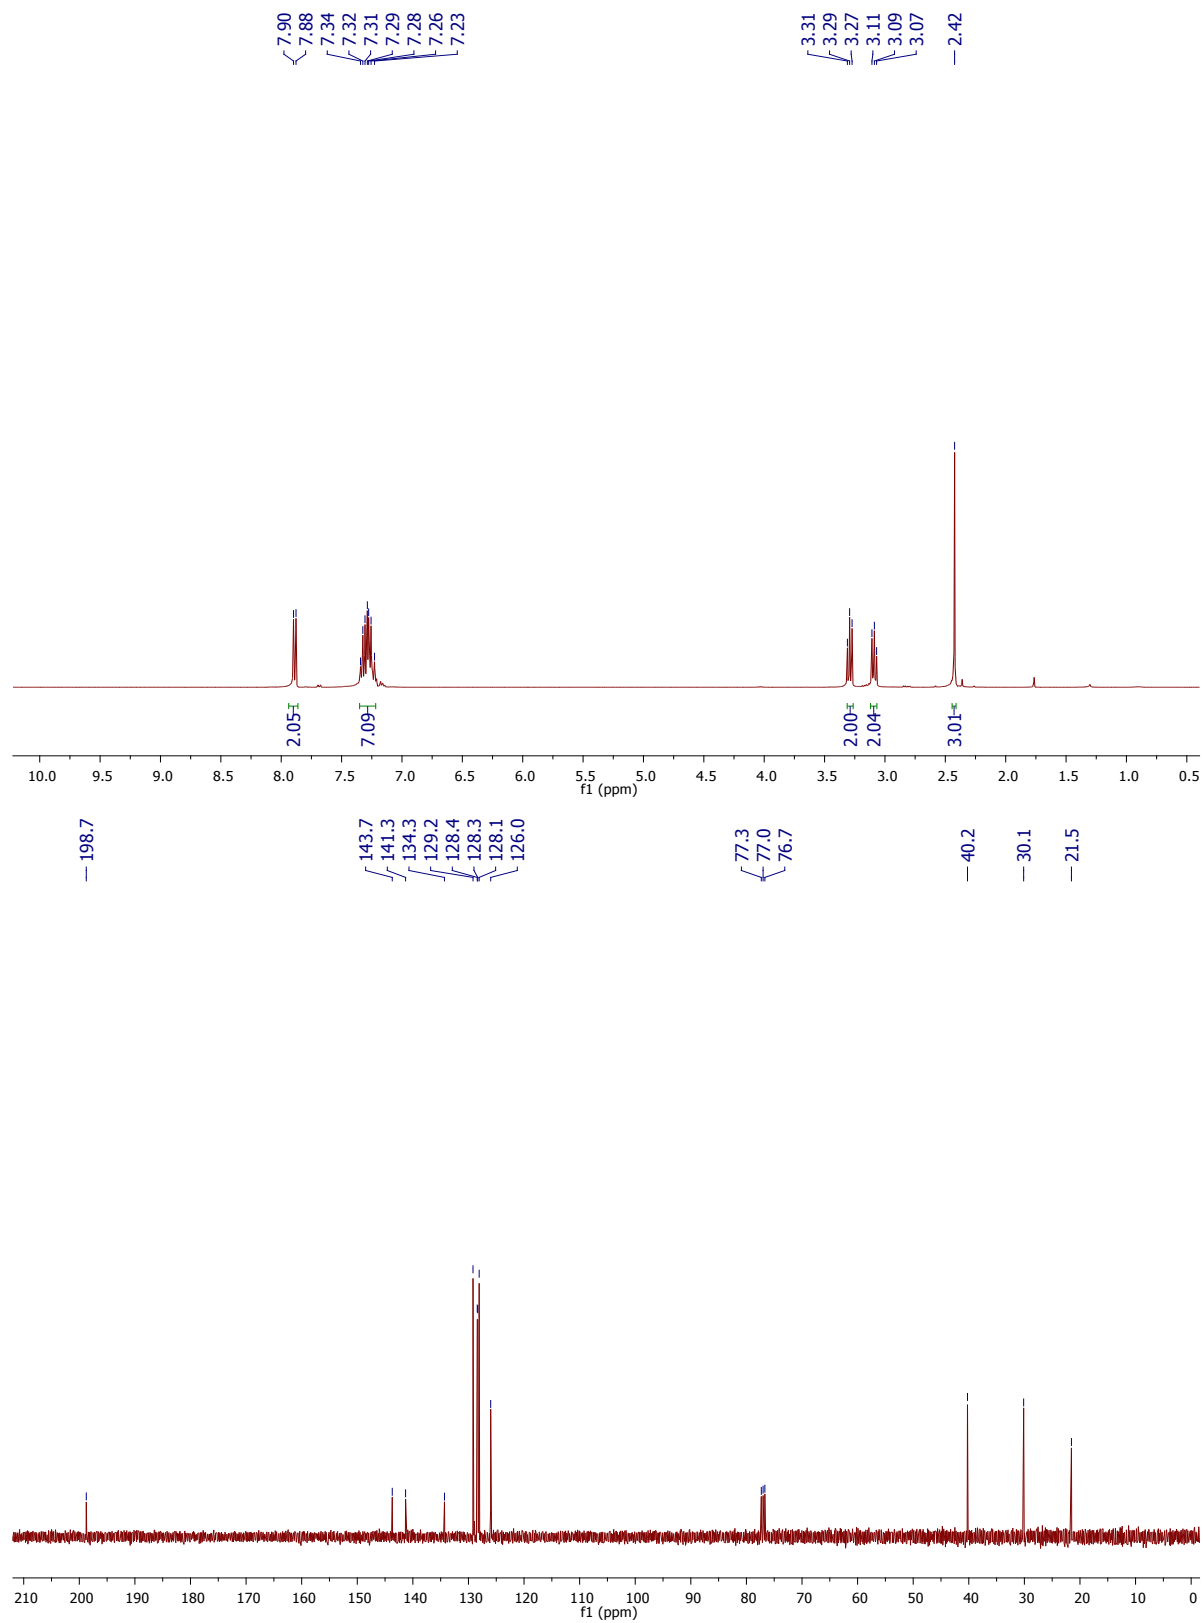

Figure S21. <sup>1</sup>H and <sup>13</sup>C NMR spectra of 5m.



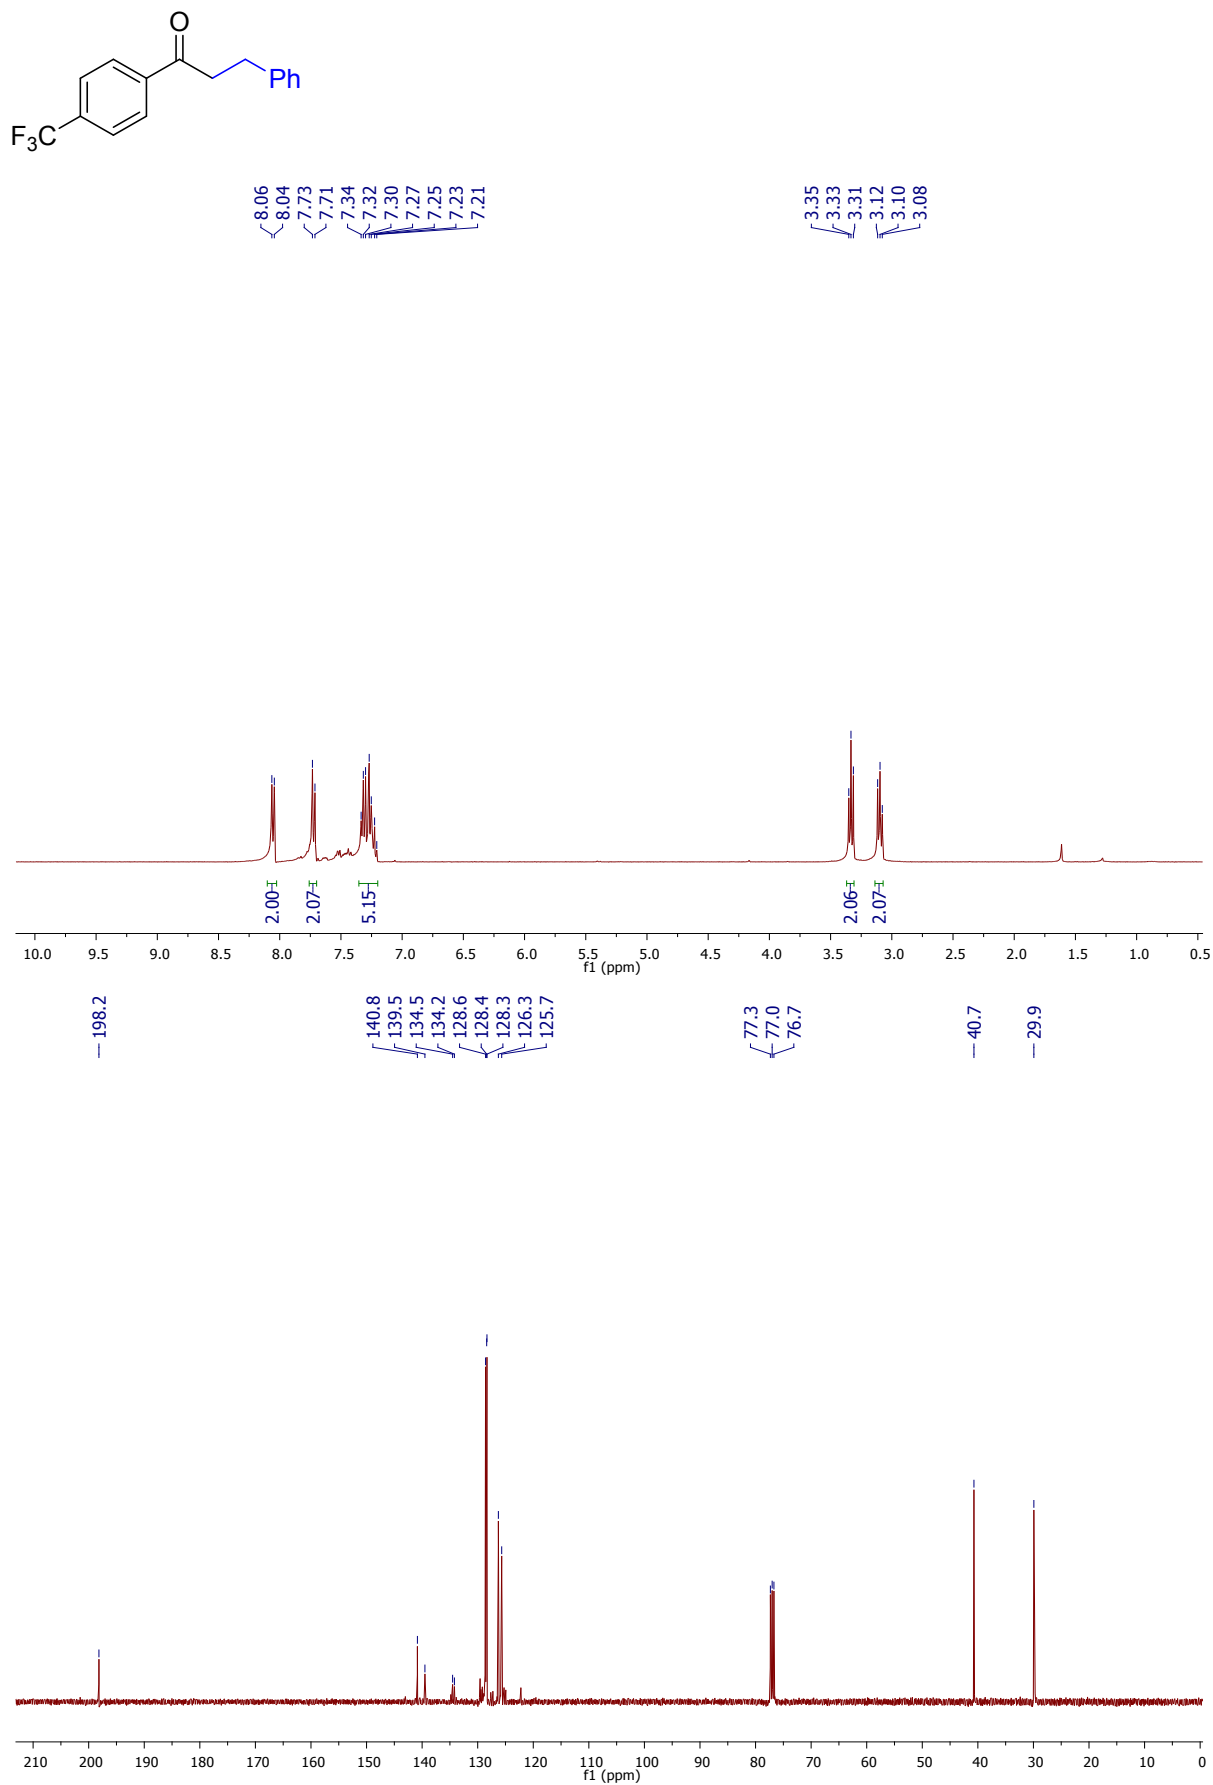

**Figure S22.** <sup>1</sup>H and <sup>13</sup>C NMR spectra of **5n**.

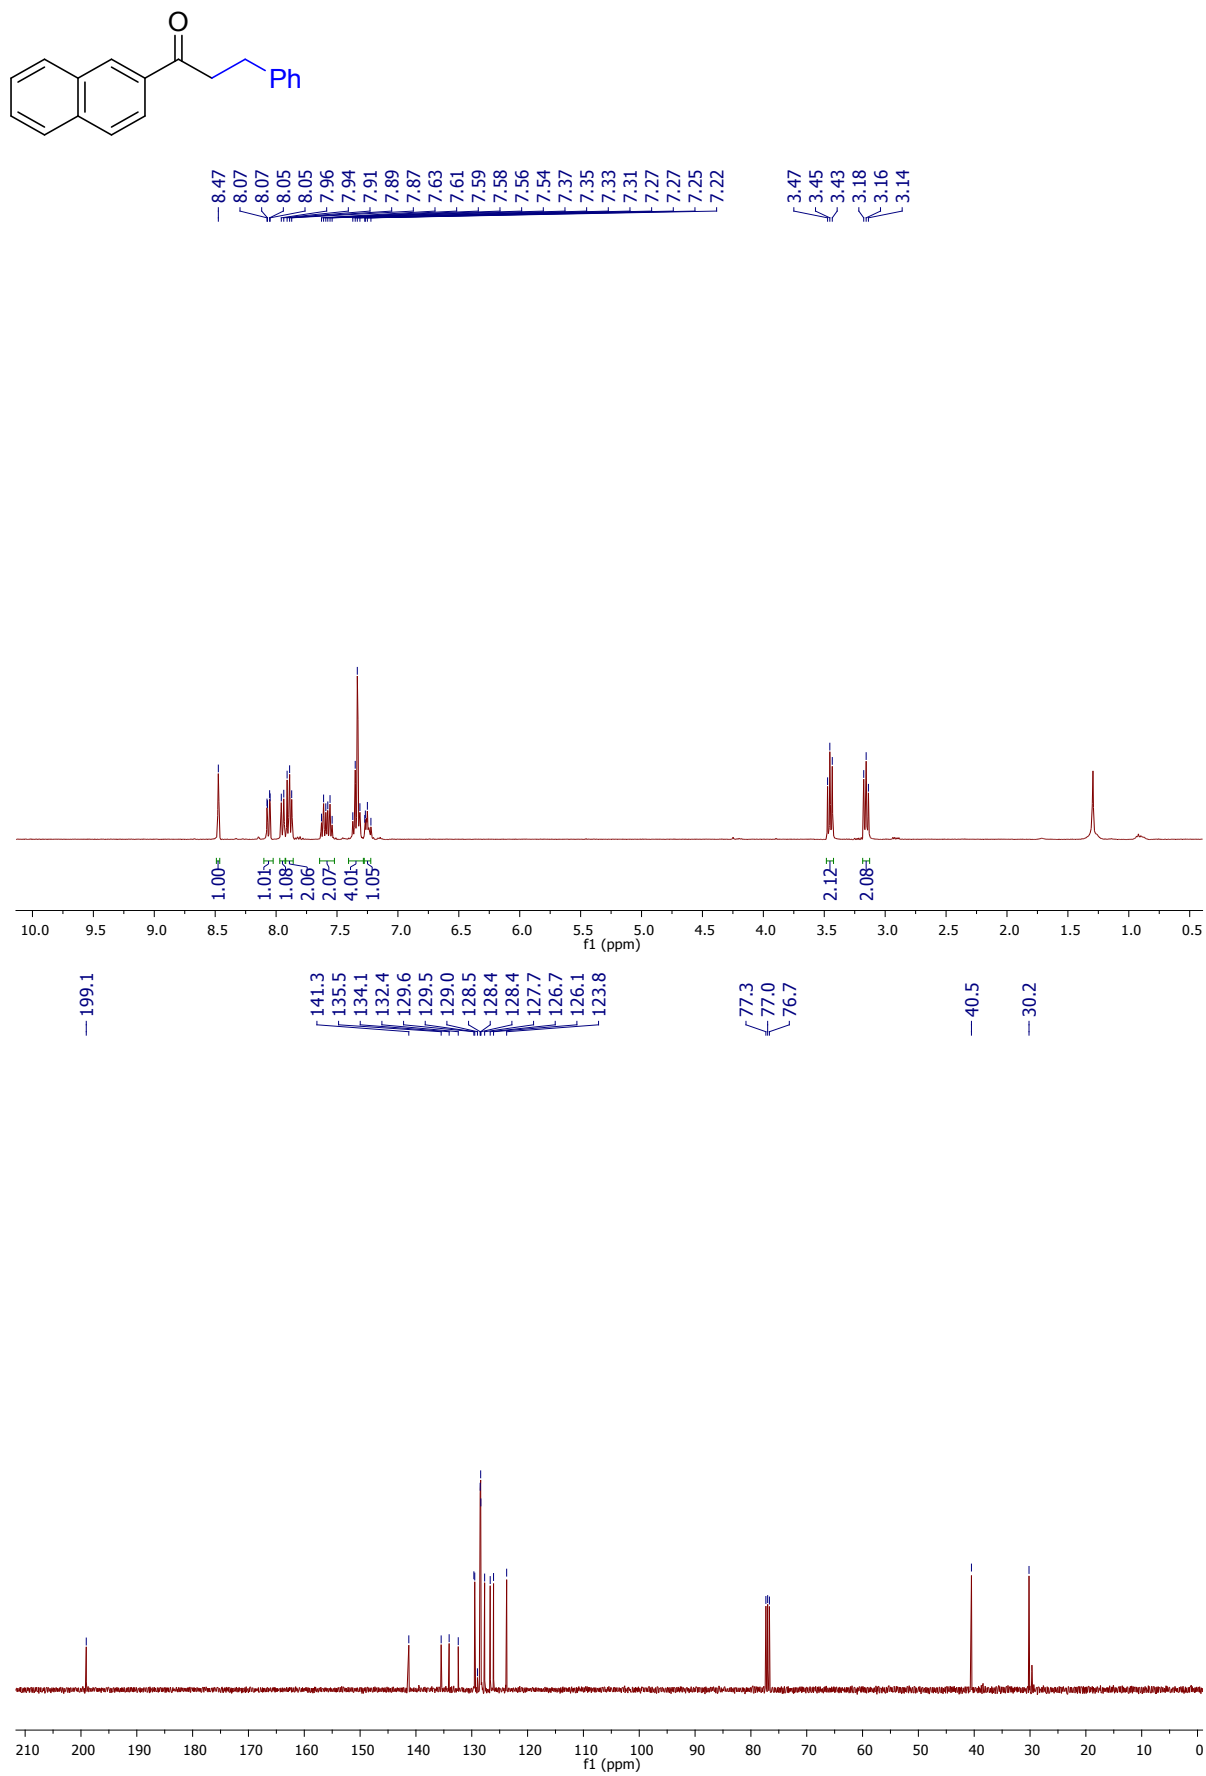

Figure S23. <sup>1</sup>H and <sup>13</sup>C NMR spectra of 5p.

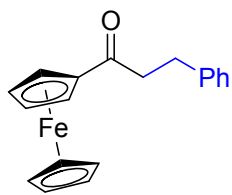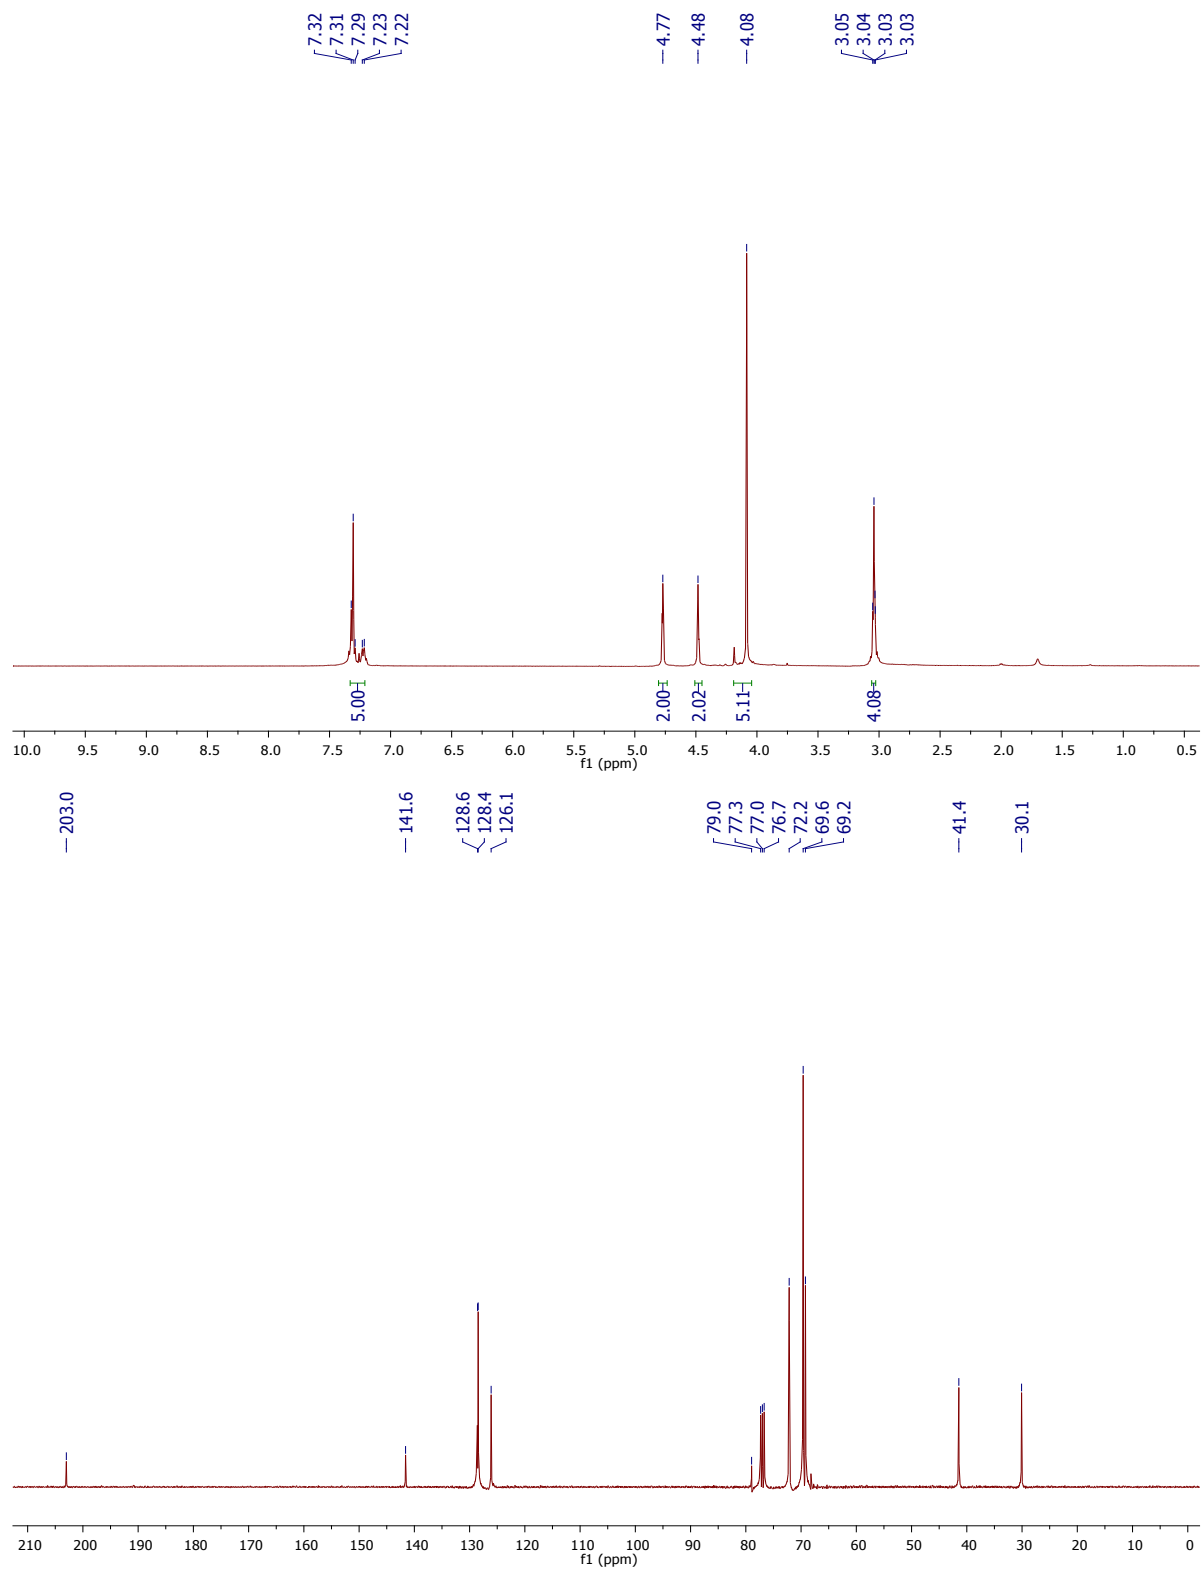

Figure S24. <sup>1</sup>H and <sup>13</sup>C NMR spectra of 5q.

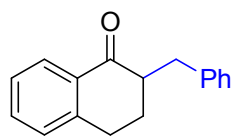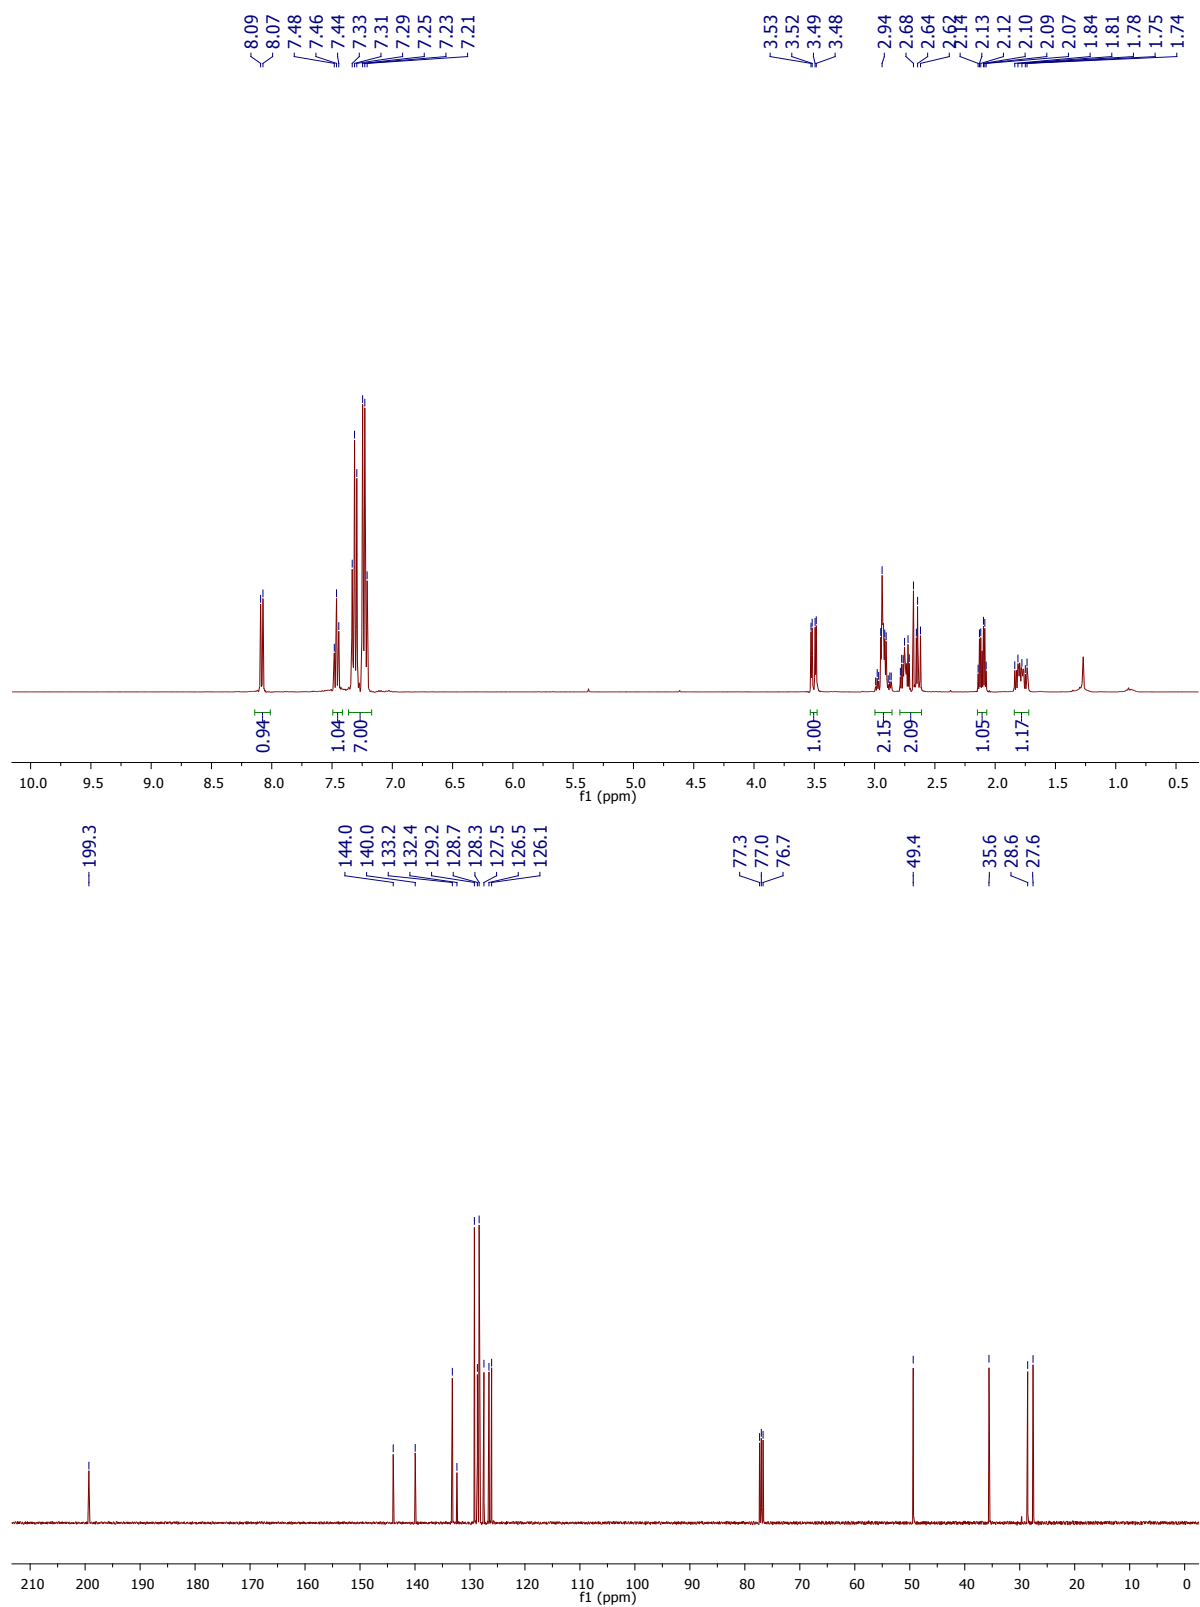

Figure S25. <sup>1</sup>H and <sup>13</sup>C NMR spectra of **5r**.

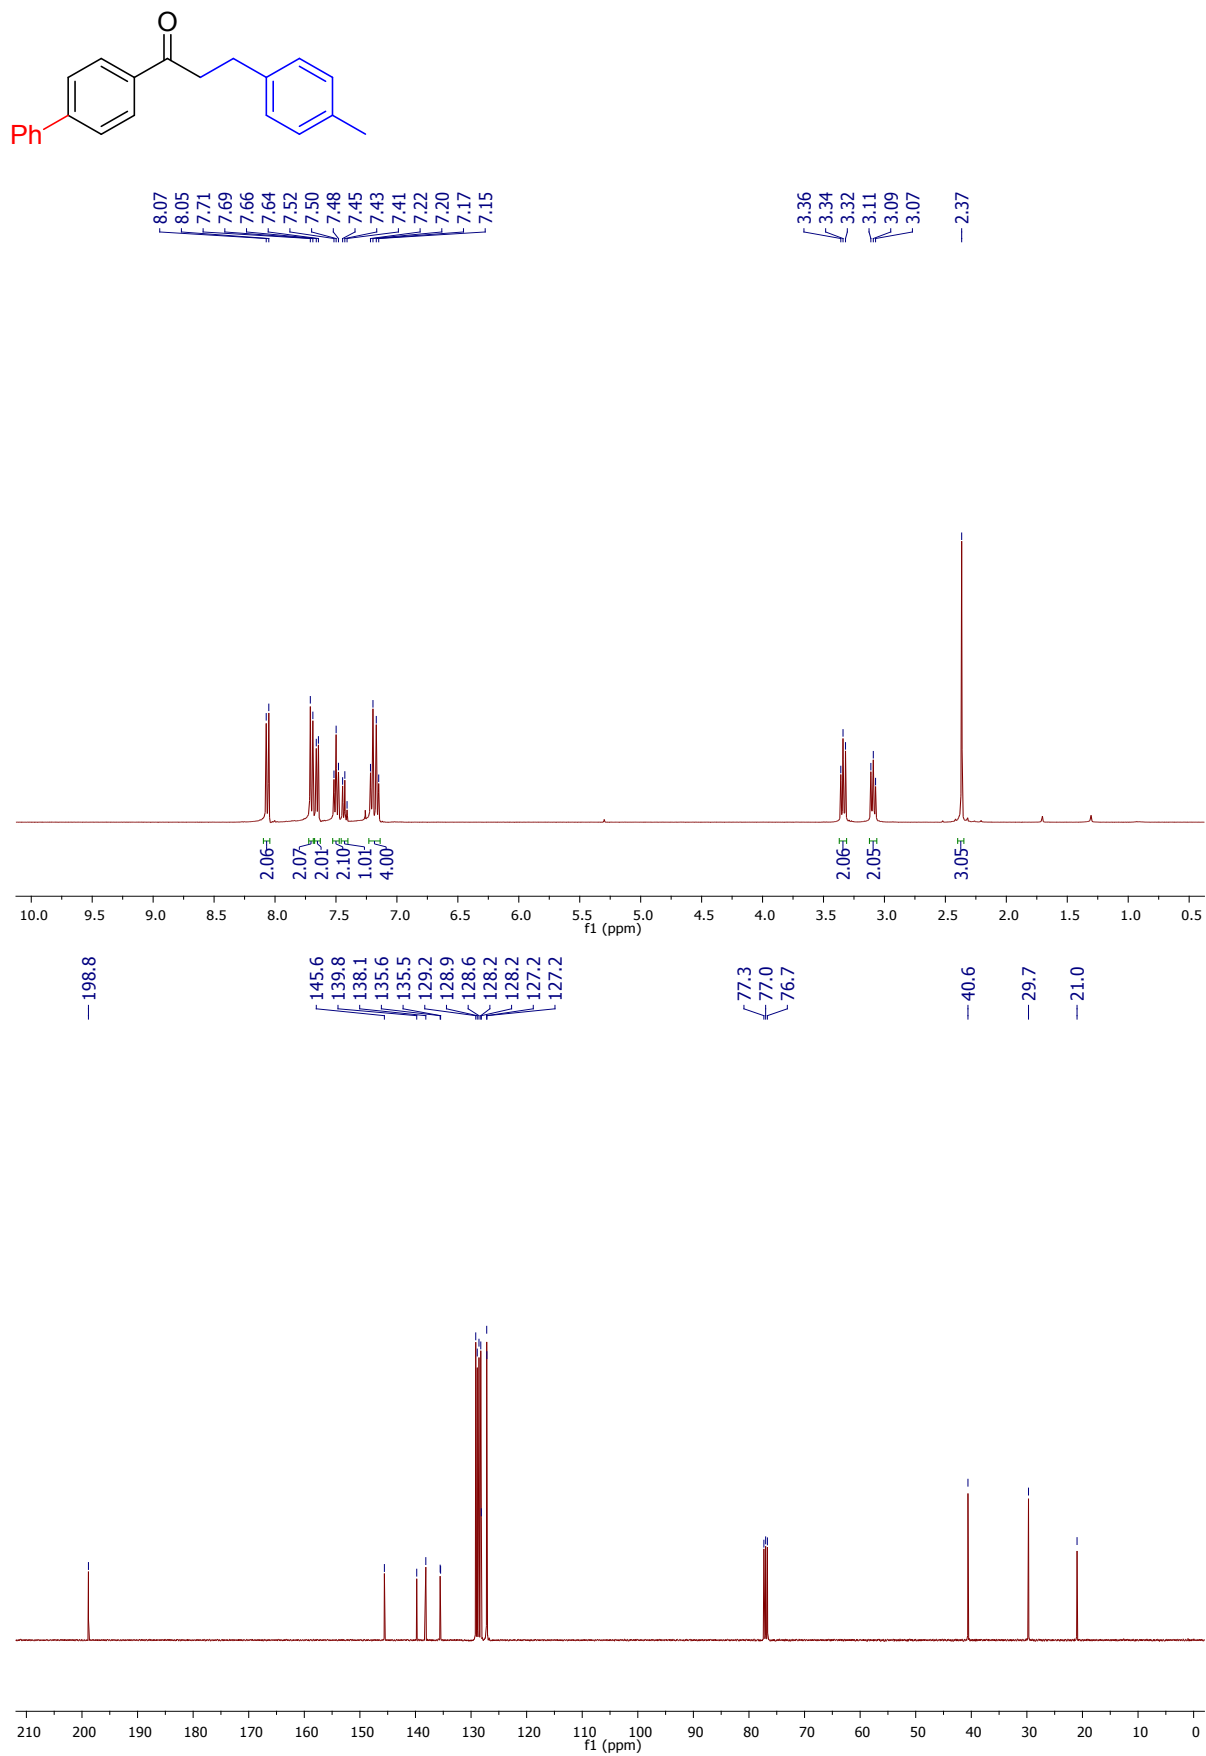

Figure S26. <sup>1</sup>H and <sup>13</sup>C NMR spectra of 5s.

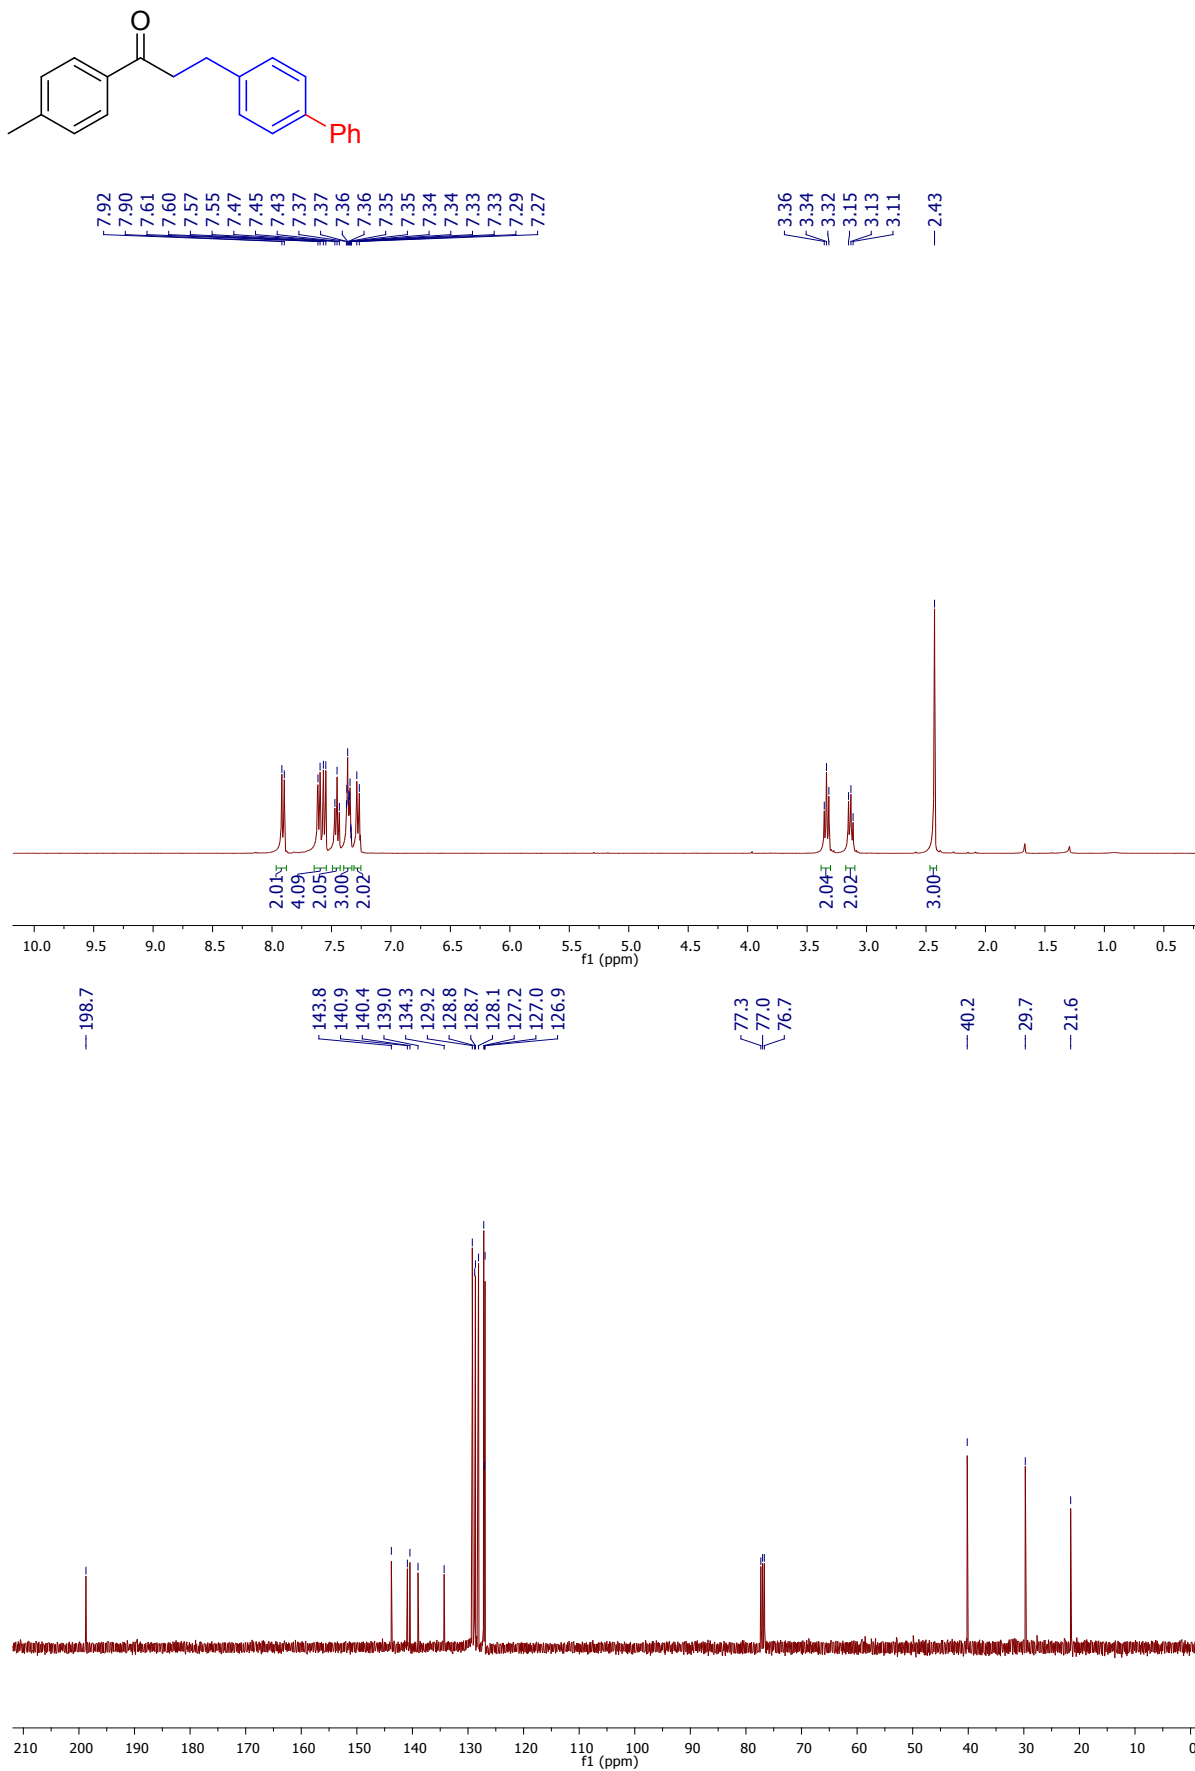

**Figure S27.**  $^1\text{H}$  and  $^{13}\text{C}$  NMR spectra of **5t**.

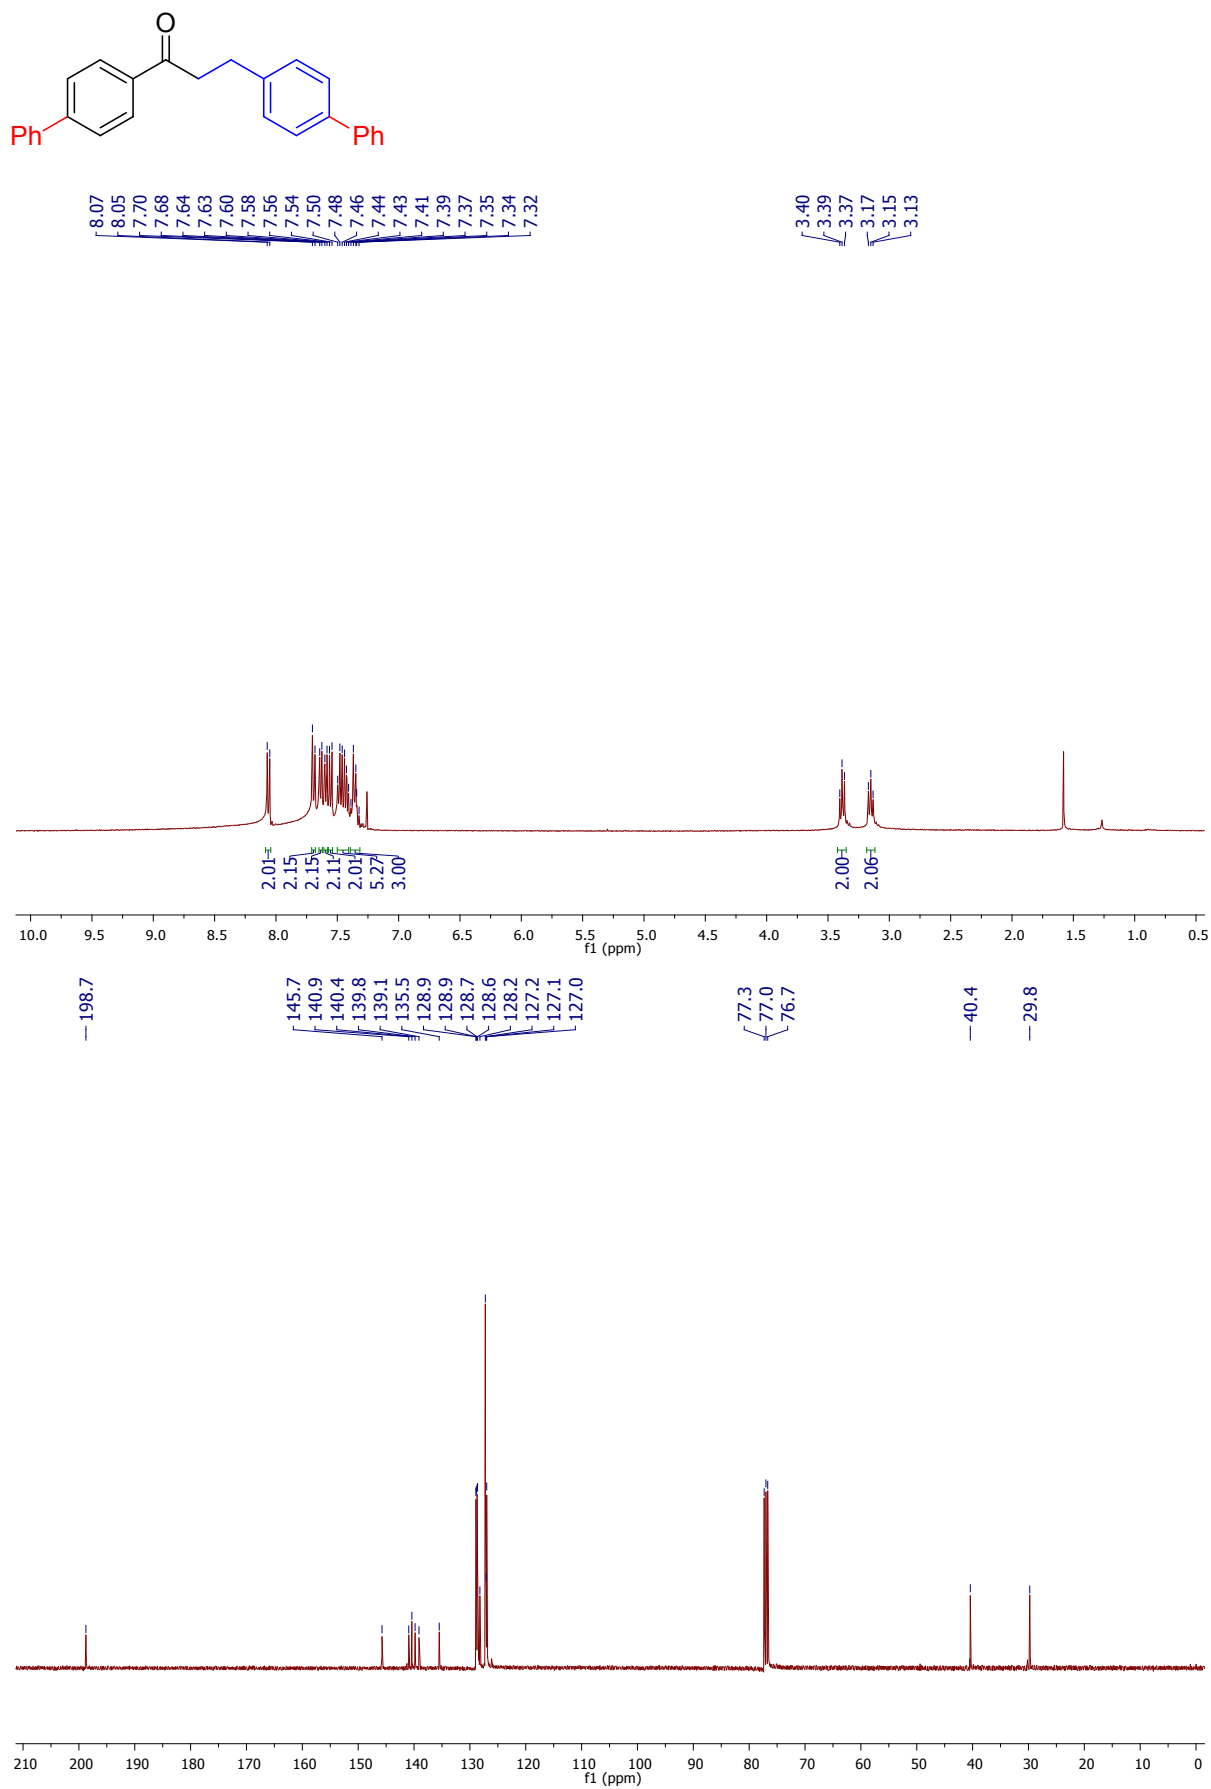

**Figure S28.** <sup>1</sup>H and <sup>13</sup>C NMR spectra of 5u.
